# Supplementary material
Source: PubMed Central journal article supplement (PMC3395220)
Supplement: NIHMS383769-supplement-1_si_001.pdf [file NIHMS383769-supplement-1_si_001.pdf]

## Supporting Information

### A NOVEL MITHRAMYCIN ANALOGUE WITH HIGH ANTITUMOR ACTIVITY AND LESS TOXICITY GENERATED BY COMBINATORIAL BIOSYNTHESIS

*Luz Elena Núñez,<sup>§\*\*</sup> S. Eric Nybo,<sup>□\*\*</sup> Javier González-Sabín,<sup>§</sup> María Pérez,<sup>□</sup> Nuria Menéndez,<sup>§</sup> Alfredo F. Braña,<sup>□</sup> Min He,<sup>†</sup> Francisco Morís,<sup>§</sup> José A. Salas,<sup>□</sup> Jürgen Rohr,<sup>□\*</sup> and Carmen Méndez<sup>□\*</sup>*

□ Departamento de Biología Funcional e Instituto Universitario de Oncología del Principado de Asturias (I.U.O.P.A), Universidad de Oviedo, Oviedo, Spain. Tel +34 985 103558. E-mail [cmendezf@uniovi.es](mailto:cmendezf@uniovi.es)

□ Department of Pharmaceutical Sciences, College of Pharmacy, University of Kentucky, Lexington, USA

§ EntreChem, S.L, Edificio Científico Tecnológico, Campus El Cristo, Oviedo, Spain

† Developmental Therapeutics Program, Division of Cancer Treatment and Diagnosis, National Cancer Institute, NIH, Rockville, USA

#### Table of contents

|                                                                                              |    |
|----------------------------------------------------------------------------------------------|----|
| Figure S0A-S0D: HPLC chromatograms .....                                                     | 2  |
| Figure S1-S7: HPLC-MS and fragmentation patterns .....                                       | 6  |
| Table S1-S7: NMR data.....                                                                   | 13 |
| Figure S8-S10: <sup>1</sup> H-NMR, <sup>13</sup> C-NMR and COSY chart for compound 5 .....   | 21 |
| Figure S11-S13: <sup>1</sup> H-NMR, <sup>13</sup> C-NMR and COSY chart for compound 6 .....  | 24 |
| Figure S14-S15: <sup>1</sup> H-NMR and COSY chart for compound 7 .....                       | 27 |
| Figure S16-S17: <sup>1</sup> H-NMR and COSY chart for compound 8 .....                       | 29 |
| Figure S18-S20: <sup>1</sup> H-NMR, <sup>13</sup> C-NMR and COSY chart for compound 9 .....  | 31 |
| Figure S21-S23: <sup>1</sup> H-NMR, <sup>13</sup> C-NMR and COSY chart for compound 10 ..... | 34 |
| Figure S24-S26: <sup>1</sup> H-NMR, <sup>13</sup> C-NMR and COSY chart for compound 11 ..... | 37 |
| Figure S27: .....                                                                            | 40 |
| Abbreviations used.....                                                                      | 41 |

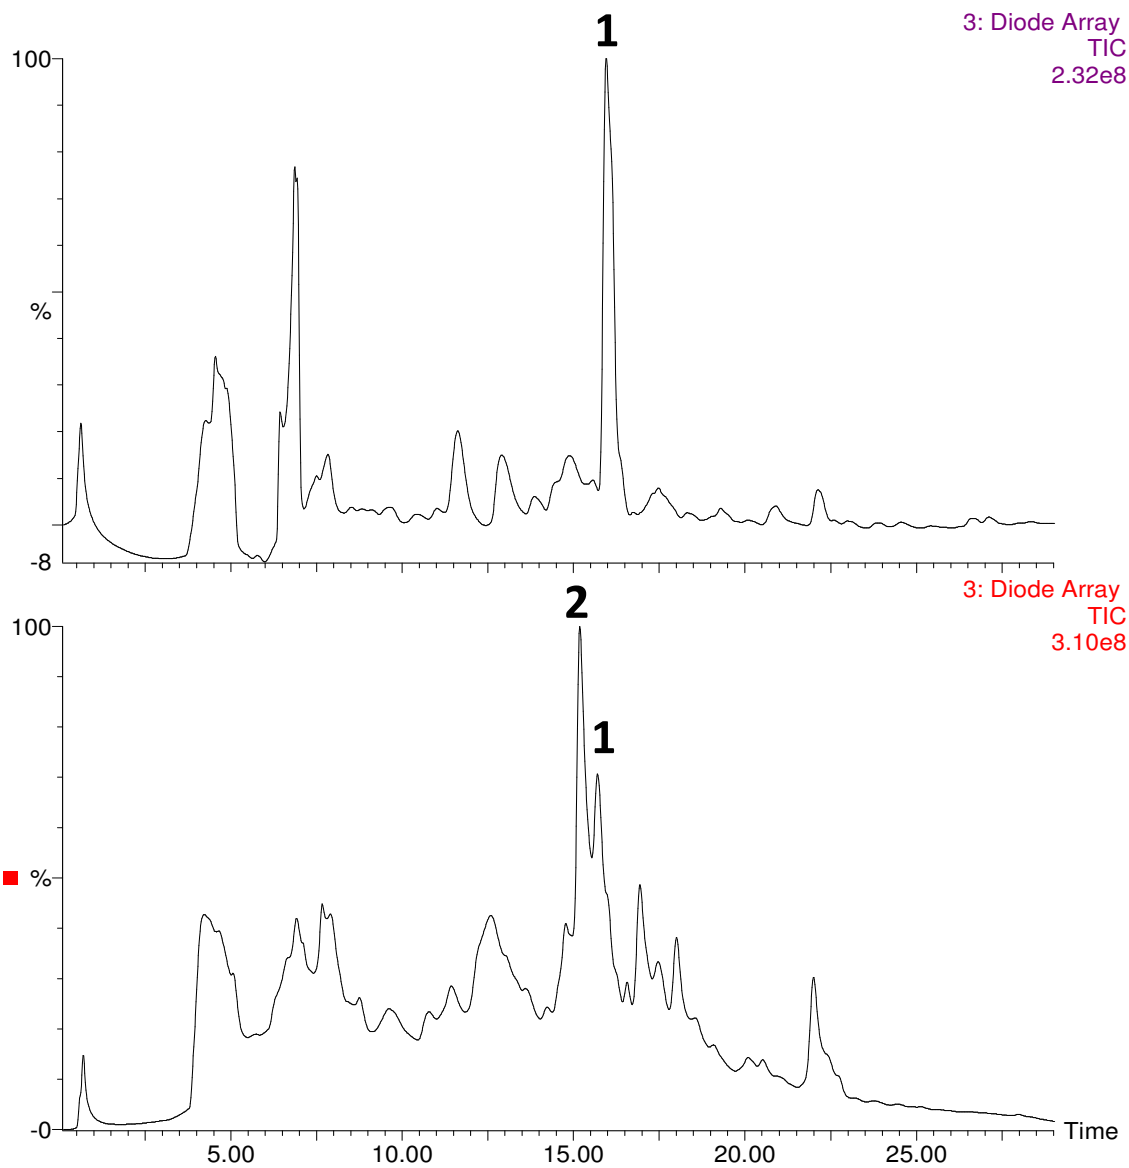

**Figure S0, A:**

upper trace HPLC chromatogram traces of an extract from wildtype *Streptomyces argillaceus* mithramycin (1)  $R_f=15.9 \text{ min}^{-1}$ ; A, lower trace: Extract from *Streptomyces argillaceus* (pKOL): mithramycin (1)  $R_f=15.9 \text{ min}^{-1}$ , demycarosyl-3D- $\beta$ -D-digitoxosyl mithramycin (2)  $R_f=15.3 \text{ min}^{-1}$ .

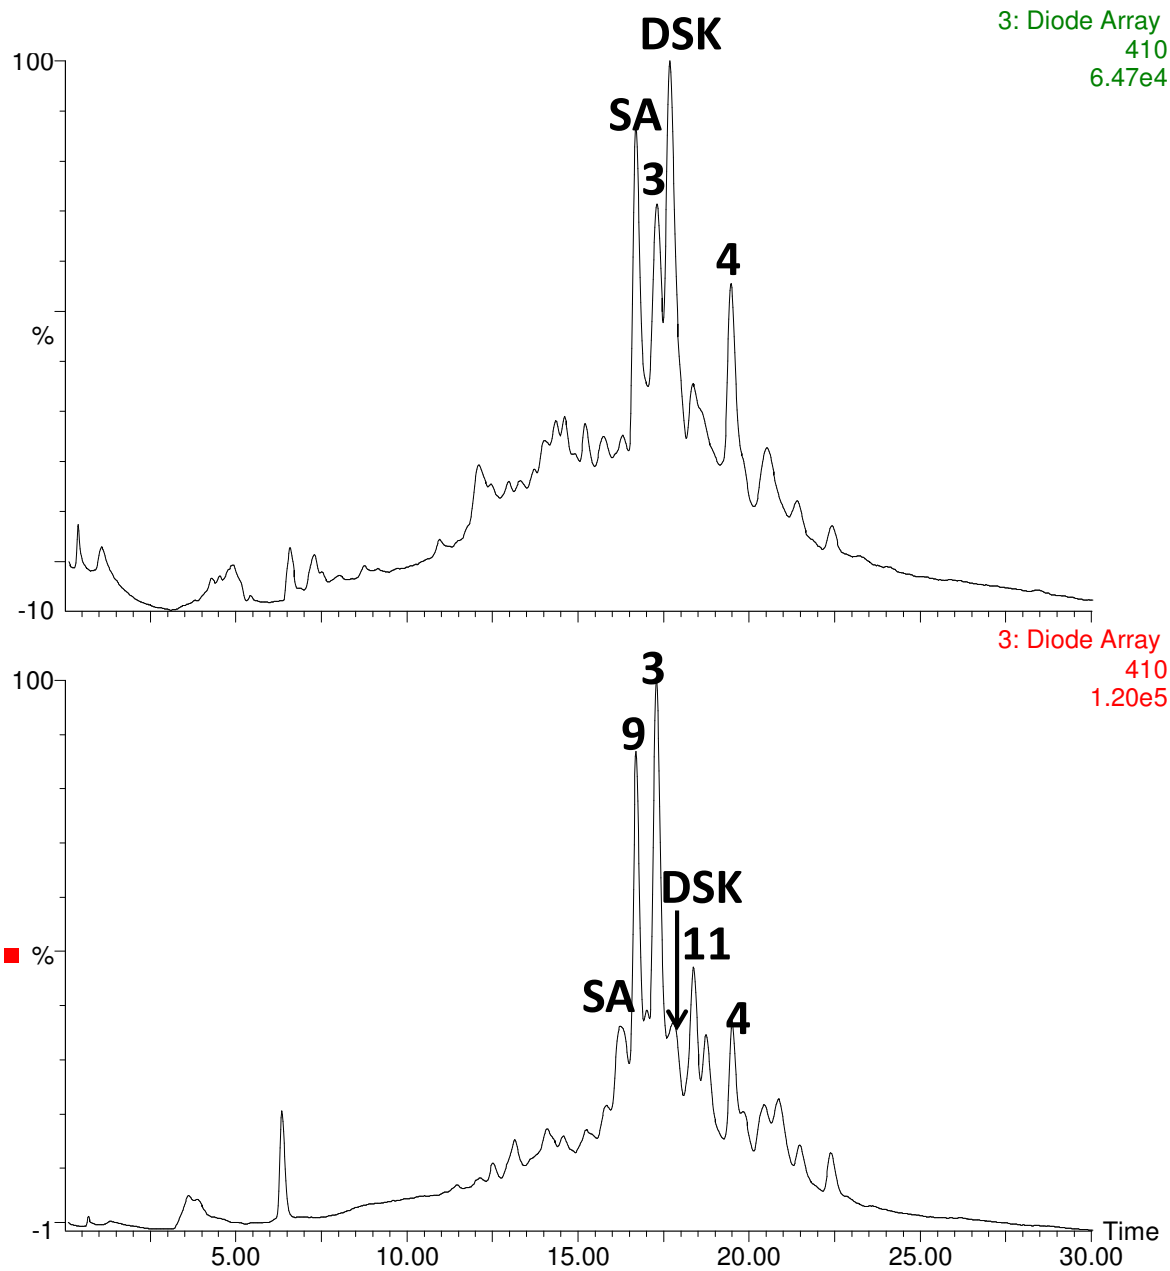

**Figure S0, B:**

upper trace: HPLC chromatogram of an extract from *Streptomyces argillaceus* M3W1: mithramycin SK (**3**)  $R_{ref}=17.1 \text{ min}^{-1}$ , mithramycin SA (**SA**)  $R_{ref}=16.4 \text{ min}^{-1}$ , demycarosyl-mithramycin SK (**DSK**)  $R_{ref}=17.6 \text{ min}^{-1}$ , and mithramycin SDK (**4**)  $R_{ref}=19.2 \text{ min}^{-1}$ . B, lower trace: Extract from *Streptomyces argillaceus* M3W1(pKOL): mithramycin SK (**3**)  $R_{ref}=17.1 \text{ min}^{-1}$ , mithramycin SA (**SA**)  $R_{ref}=16.4 \text{ min}^{-1}$ , demycarosyl-mithramycin SK (DSK)  $R_{ref}=17.6 \text{ min}^{-1}$ , and mithramycin SDK (**3**)  $R_{ref}=19.2 \text{ min}^{-1}$ , demycarosyl-3D- $\beta$ -D-digitoxosyl mithramycin SK (**5**)  $R_{ref}=16.6 \text{ min}^{-1}$ , and demycarosyl-3D- $\beta$ -D-digitoxosyl mithramycin SDK (**6**)  $R_{ref}=18.6 \text{ min}^{-1}$ .

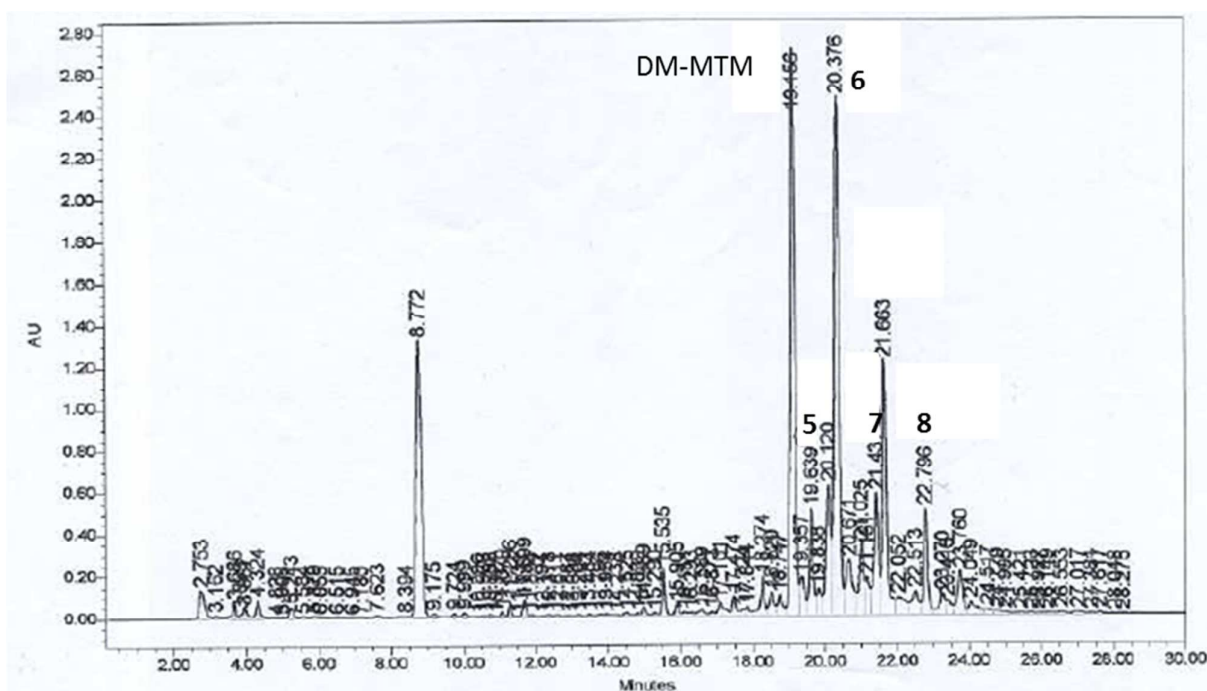

**Figure S0, C:**

HPLC chromatogram of an extract from *Streptomyces argillaceus* M7C1-pFL845: demycarosyl-mithramycin (DM-MTM)  $R_{ret}=19.2 \text{ min}^{-1}$ , dideolivosyl-6- $\beta$ -D-amicetosyl-demycarosyl-2-O- $\beta$ -D-olivosyl-3C- $\beta$ -D-olivosyl-mithramycin (**5**)  $R_{ret}=19.6 \text{ min}^{-1}$ , dideolivosyl-6- $\beta$ -D-amicetosyl-demycarosyl-mithramycin (**6**)  $R_{ret}=20,4 \text{ min}^{-1}$ , deolivosyl-demycarosyl-3C- $\beta$ -D-amicetosyl-mithramycin (**7**)  $R_{ret}=21.4 \text{ min}^{-1}$  and dideolivosyl-6- $\beta$ -D-amicetosyl-deolivosyl-demycarosyl-3C- $\beta$ -D-amicetosyl-mithramycin (**8**)  $R_{ret}=22.8 \text{ min}^{-1}$ .

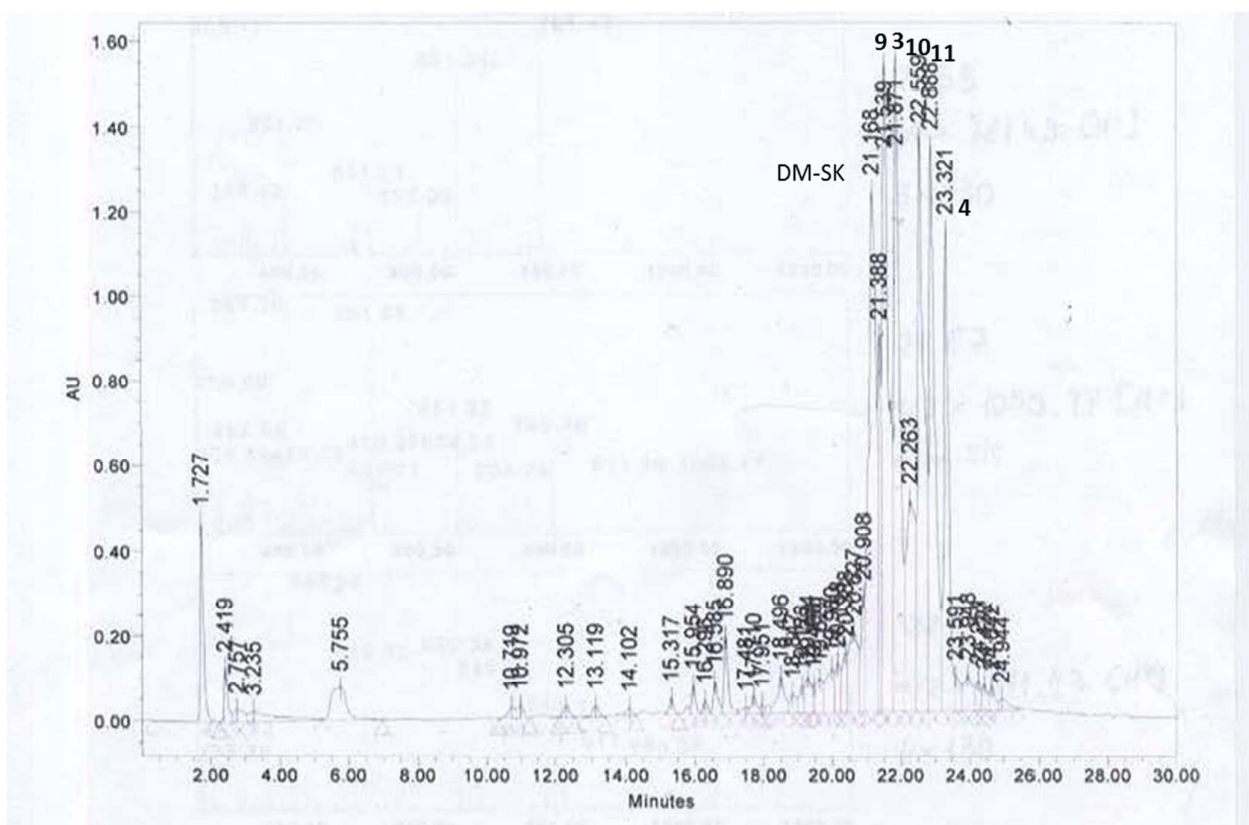

**Figure S0, D:**

HPLC chromatogram of an extract from *Streptomyces argillaceus* M3W1-pMP3\*BII: demycarosyl-mithramycin SK (DM-SK)  $R_{ret}=21.2 \text{ min}^{-1}$ , demycarosyl-3D- $\beta$ -D-digitoxosyl-mithramycin SK (**9**)  $R_{ret}=21.5 \text{ min}^{-1}$ , mithramycin SK (**3**)  $R_{ret}=21.9 \text{ min}^{-1}$ , demycarosyl-mithramycin SDK (**10**)  $R_{ret}=22.5 \text{ min}^{-1}$ , demycarosyl-3D- $\beta$ -D-digitoxosyl-mithramycin SDK (**11**)  $R_{ret}=22.9 \text{ min}^{-1}$  and mithramycin SDK (**4**)  $R_{ret}=23.3 \text{ min}^{-1}$ .

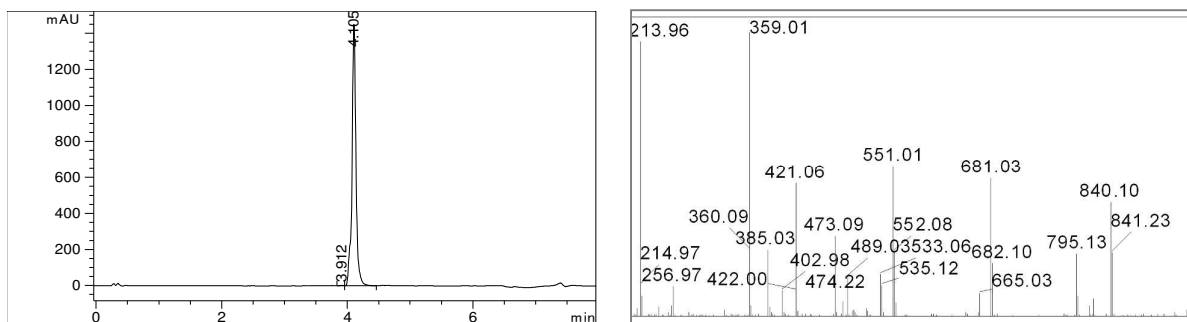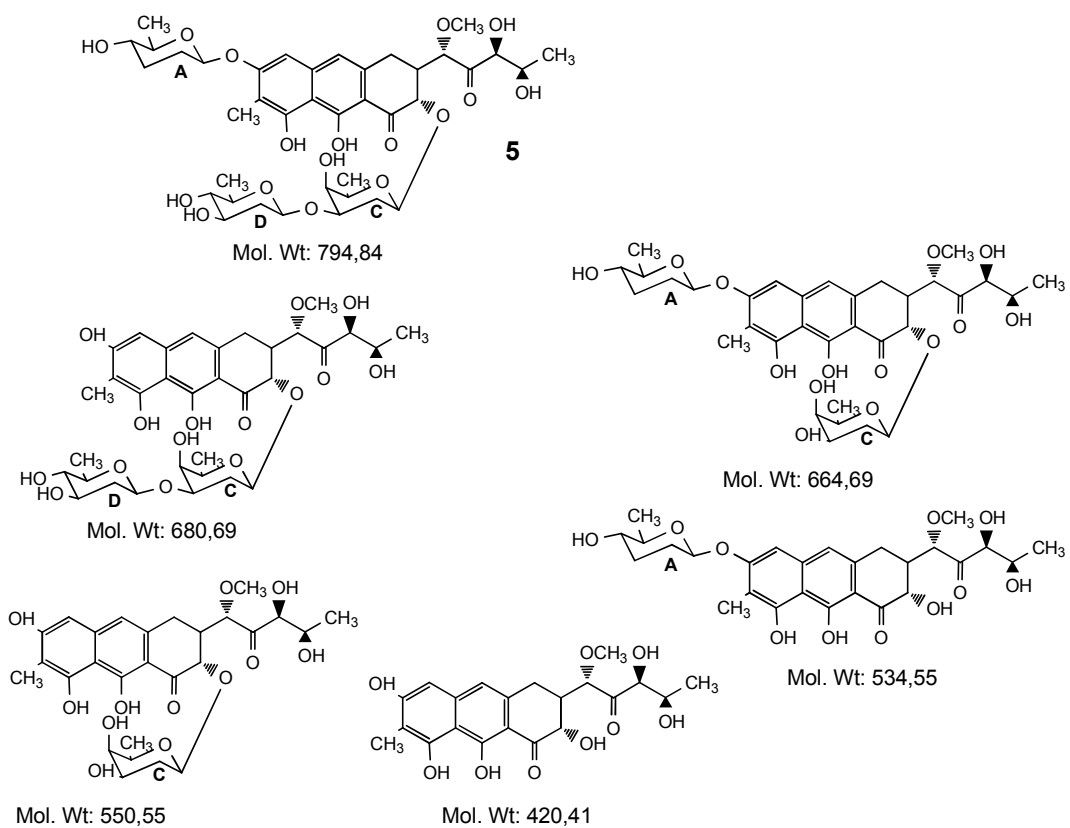

**Figure S1:** HPLC-MS and fragmentation pattern of the compound 5.

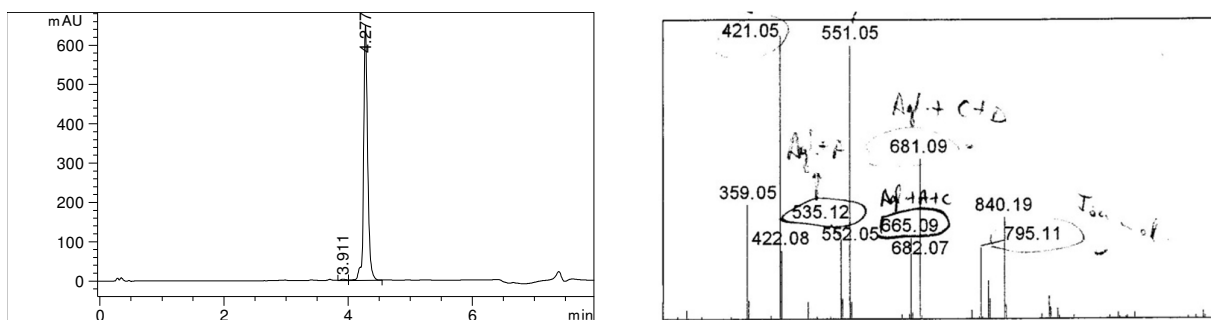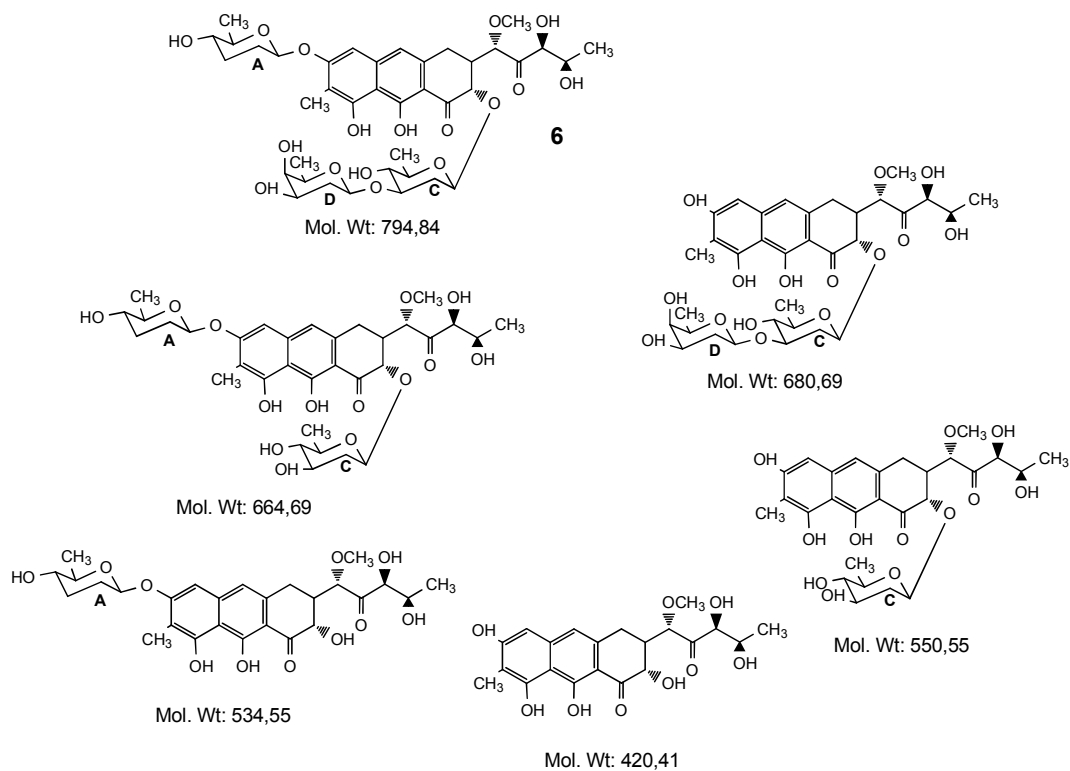

**Figure S2:** HPLC-MS and fragmentation pattern of the compound **6**.

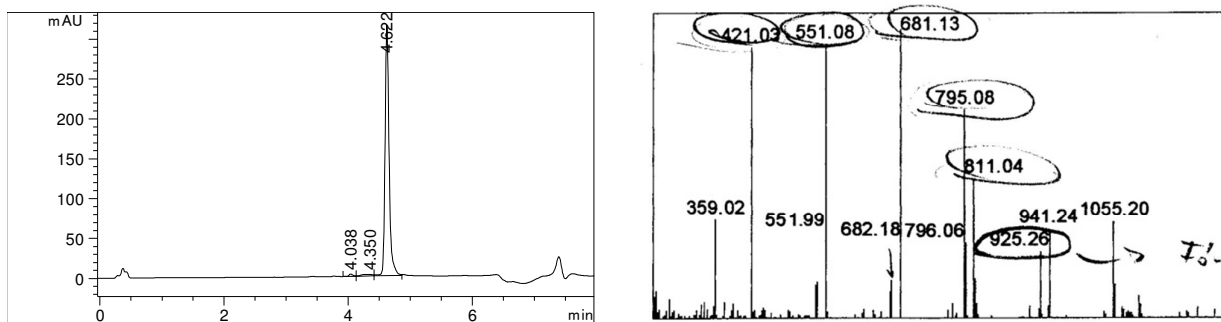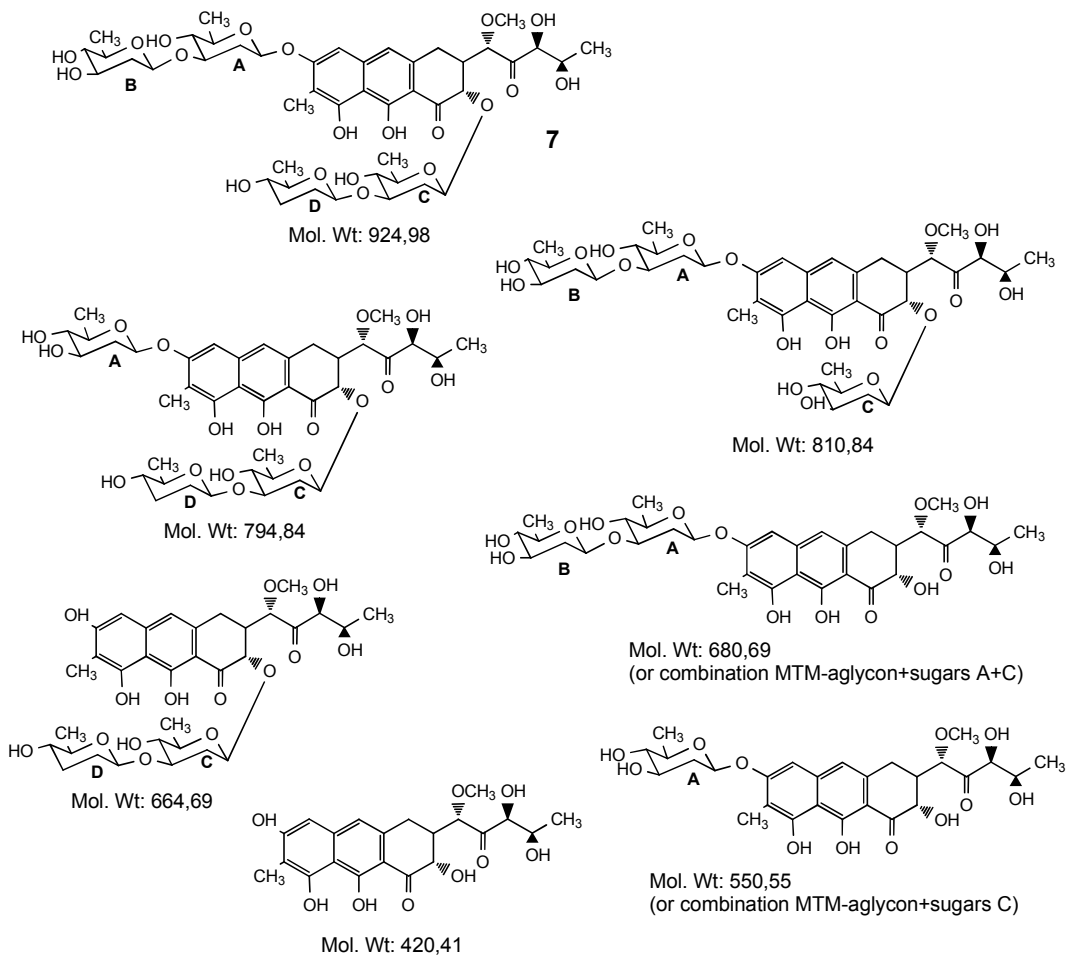

**Figure S3:** HPLC-MS and fragmentation pattern of the compound 7.



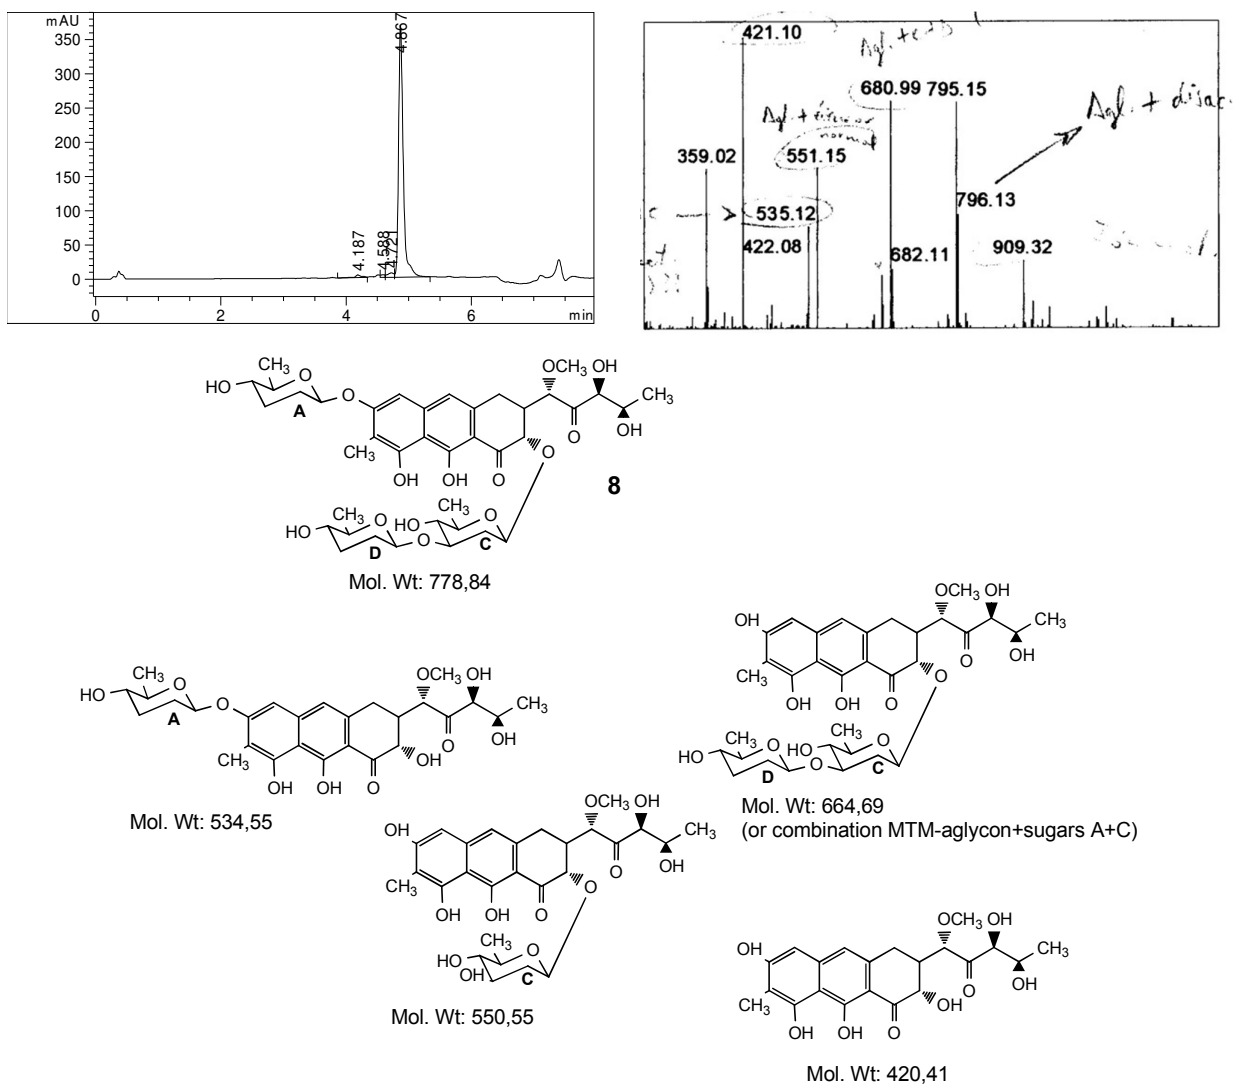

**Figure S4:** HPLC-MS and fragmentation pattern of the compound **8**.

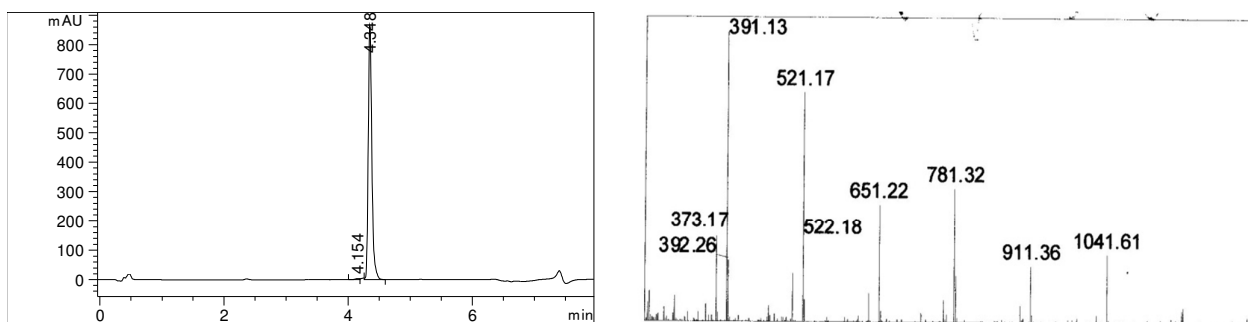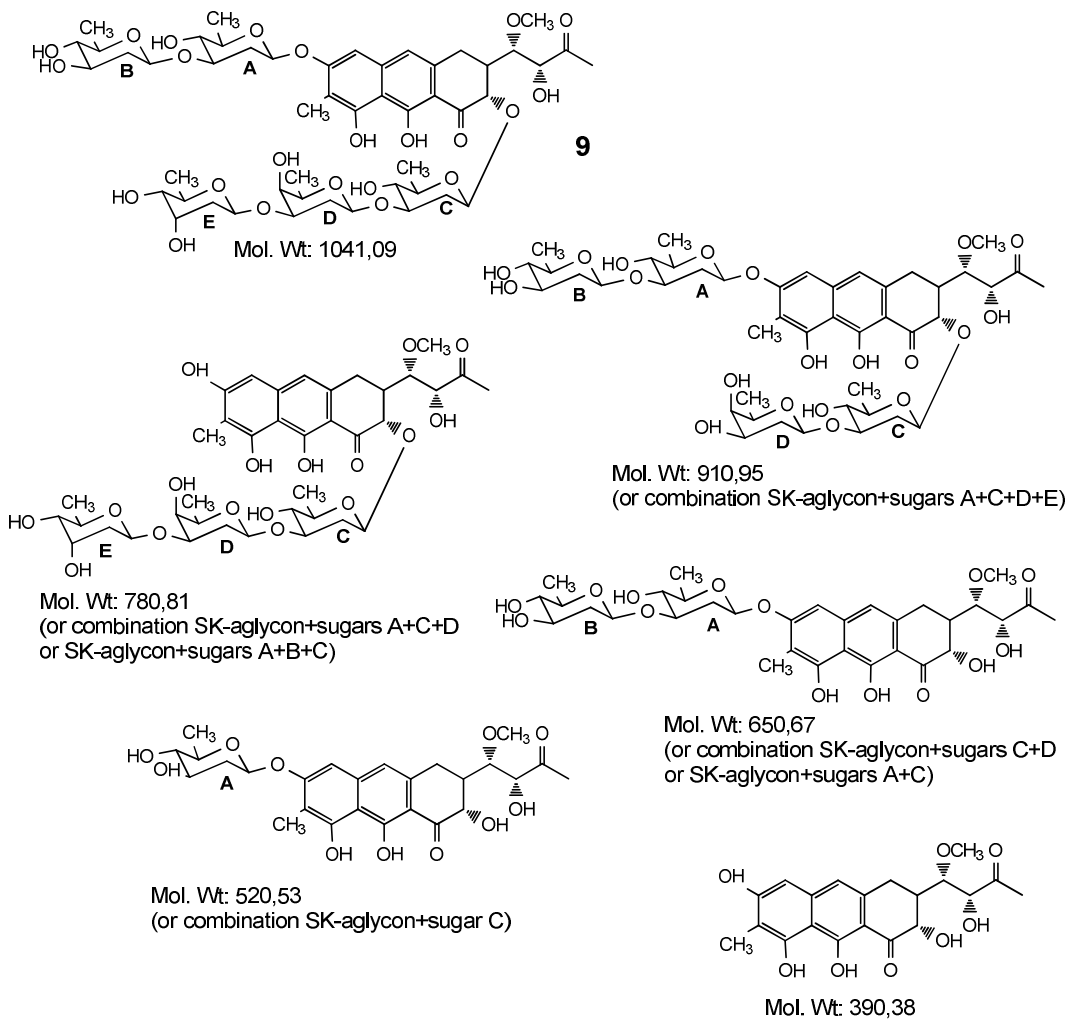

**Figure S5:** HPLC-MS and fragmentation pattern of the compound **9**.

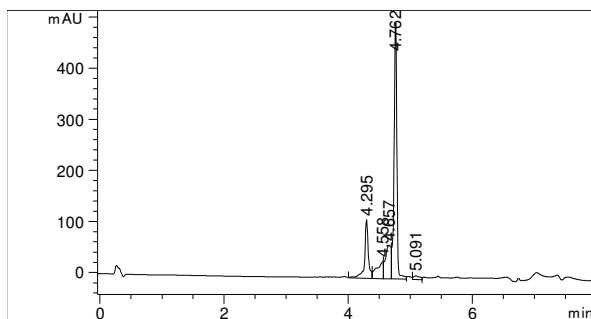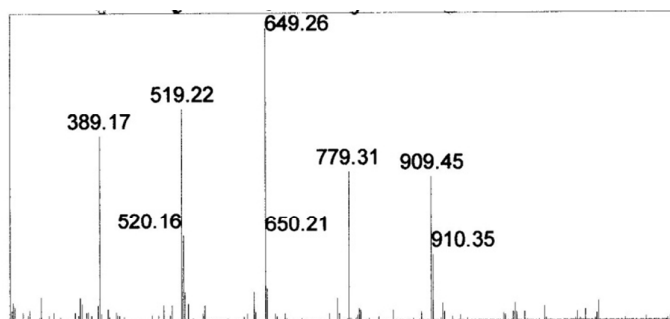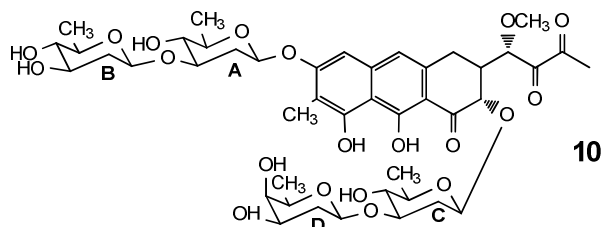

**10**

Mol. Wt: 908,94

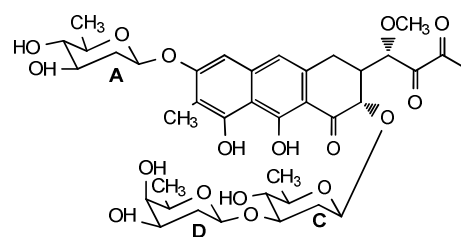

Mol. Wt: 778,79  
(or combination SDK-aglycon+sugars A+B+C)

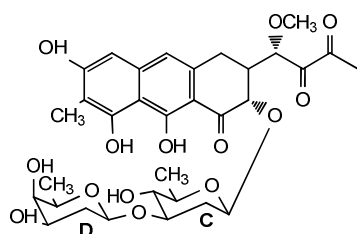

Mol. Wt: 648,65  
(or combination SDK-aglycon+sugars A+C)

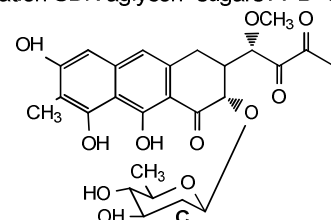

Mol. Wt: 518,51  
(or combination SDK-aglycon+sugar A)

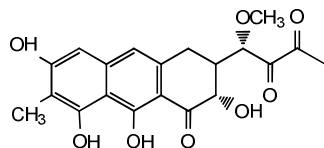

Mol. Wt: 388,37

**Figure S6:** HPLC-MS and fragmentation pattern of the compound **10**.

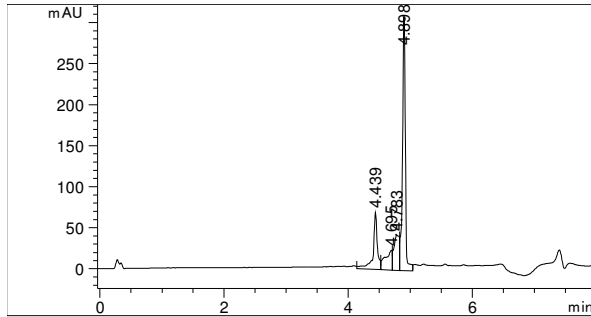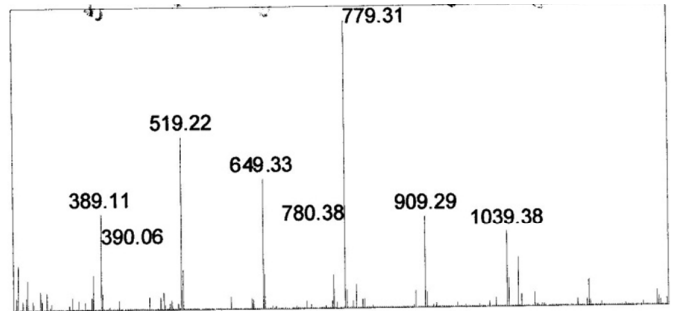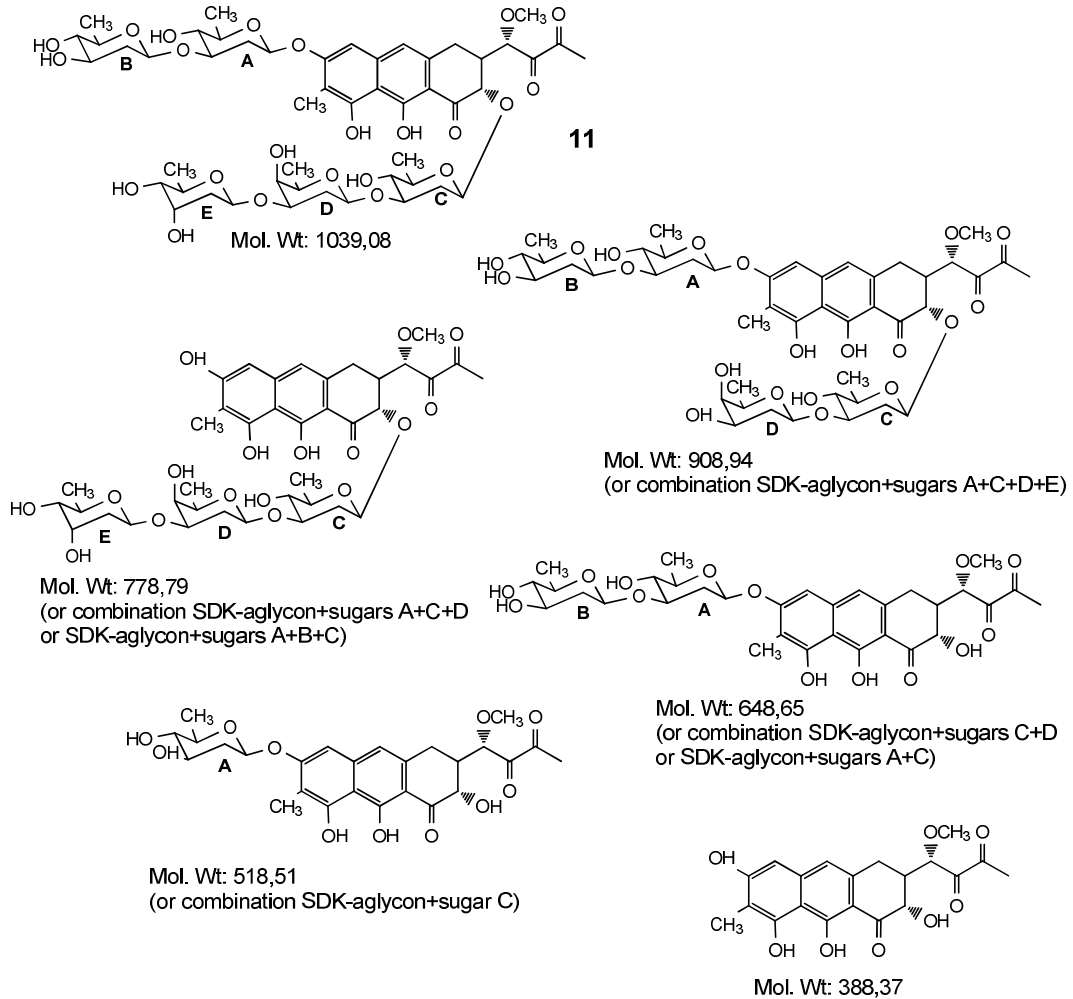

**Figure S7:** HPLC-MS and fragmentation pattern of the compound **11**.

**Table S1:** NMR data for dideolivosyl-6- $\beta$ -D-amicetosyl-demycarosyl-2-O- $\beta$ -D-oliosyl-3C- $\beta$ -D-olivosyl-MTM (**5**) in acetone-*d*<sub>6</sub> (<sup>1</sup>H, 600 MHz)

| Position            | <sup>1</sup> H-NMR ( $\delta$ in ppm, multiplicity, <i>J</i> (H,H) in Hz) | <sup>13</sup> C-NMR ( $\delta$ in ppm) | Multiplicity    |
|---------------------|---------------------------------------------------------------------------|----------------------------------------|-----------------|
| 1                   |                                                                           | 200.1                                  | C               |
| 2                   | 4.60 brs                                                                  | 77.3                                   | CH              |
| 3                   | 2.80 (overlapped)                                                         | 41.3                                   | CH              |
| 4 <sub>ax</sub>     | 2.69 dd (16.8, 3.6)                                                       | 27.3                                   | CH <sub>2</sub> |
| 4 <sub>eq</sub>     | 2.90 (overlapped with 4C)                                                 |                                        |                 |
| 4a                  |                                                                           | 135.8                                  | C               |
| 5                   | 6.95 (s)                                                                  | 101.3                                  | CH              |
| 6                   |                                                                           | 159.6                                  | C               |
| 7                   |                                                                           | 110.7                                  | C               |
| 7-CH <sub>3</sub>   | 2.16 (s)                                                                  | 7.5                                    | CH <sub>3</sub> |
| 8                   |                                                                           | 155.8                                  | C               |
| 8a                  |                                                                           | 107.7                                  | C               |
| 9                   |                                                                           | 164.0                                  | C               |
| 9a                  |                                                                           | 109.0                                  | C               |
| 10                  | 6.90 (s)                                                                  | 116.9                                  | CH              |
| 10a                 |                                                                           | 138.2                                  | C               |
| 1'                  | 4.65 s                                                                    | 83.9                                   | CH              |
| 1'-OCH <sub>3</sub> | 3.35 (s)                                                                  | 58.3                                   | CH <sub>3</sub> |
| 2'                  |                                                                           | 211.6                                  | C               |
| 3'                  | 4.30 (overlapped with 4')                                                 | 79.3                                   | CH              |
| 4'                  | 4.30 (overlapped with 3')                                                 | 67.4                                   | CH              |
| 5'                  | 1.25 d (6.2)                                                              | 19.3                                   | CH <sub>3</sub> |
| 1A                  | 5.38 brd (8.6)                                                            | 98.5                                   | CH              |
| 2A <sub>ax</sub>    | 1.90 (overlapped with 2D <sub>eq</sub> )                                  | 30.3                                   | CH <sub>2</sub> |
| 2A <sub>eq</sub>    | 2.10 (overlapped)                                                         |                                        |                 |
| 3A <sub>ax</sub>    | 1.65 m (signal not resolved)                                              | 30.8                                   | CH <sub>2</sub> |
| 3A <sub>eq</sub>    | 2.10 (overlapped)                                                         |                                        |                 |
| 4A                  | 3.3 m (signal not resolved)                                               | 70.5                                   | CH              |
| 5A                  | 3.58 dq (8.6, 6.4)                                                        | 76.2                                   | CH              |
| 6A                  | 1.32 d (6.4)                                                              | 17.8                                   | CH <sub>3</sub> |
| 1C                  | 4.65 dd (9.0, 2.5)                                                        | 100.2                                  | CH              |
| 2C <sub>ax</sub>    | 1.73 ddd (12.0, 12.0, 9.0)                                                | 34.8                                   | CH <sub>2</sub> |
| 2C <sub>eq</sub>    | 1.90 (overlapped with 2A <sub>ax</sub> )                                  |                                        |                 |
| 3C                  | 3.75 m (signal not resolved)                                              | 68.6                                   | CH <sub>2</sub> |
| 4C                  | 3.51 t (3.9)                                                              | 69.8                                   | CH              |
| 5C                  | 3.65 brq partially overlapped (6.5)                                       | 70.9                                   | CH              |
| 6C                  | 1.28 d (6.1)                                                              | 16.1                                   | CH <sub>3</sub> |
| 1D                  | 4.85 brd (9.2)                                                            | 98.3                                   | CH              |
| 2D <sub>ax</sub>    | 1.65 brq (12.0)                                                           | 37.3                                   | CH <sub>2</sub> |
| 2D <sub>eq</sub>    | 2.54 brdd (12.0, 5.4)                                                     |                                        |                 |
| 3D                  | 3.65 (overlapped with 5D)                                                 | 81.3                                   | CH              |
| 4D                  | 2.90 t partially overlapped with 4 <sub>eq</sub>                          | 75.2                                   | CH              |
| 5D                  | 3.21 dq (9.0, 5.9)                                                        | 72.1                                   | CH              |
| 6D                  | 1.15 d (5.9)                                                              | 17.3                                   | CH <sub>3</sub> |

**Table S2:** NMR data for dideolivosyl-6- $\beta$ -D-amicetosyl-demycarosyl-MTM (**6**) in acetone- $d_6$  ( $^1\text{H}$ , 600 MHz)

| Position            | $^1\text{H-NMR}$ ( $\delta$ in ppm, multiplicity, $J$ (H,H) in Hz) | $^{13}\text{C-NMR}$ ( $\delta$ in ppm) | Multiplicity    |
|---------------------|--------------------------------------------------------------------|----------------------------------------|-----------------|
| 1                   |                                                                    | 203.4                                  | C               |
| 2                   | 4.82 d (11.6)                                                      | 76.6                                   | CH              |
| 3                   | 2.80 (overlapped)                                                  | 42.4                                   | CH              |
| 4 <sub>ax</sub>     | 2.69 dd (16.3, 3.4)                                                | 26.9                                   | CH <sub>2</sub> |
| 4 <sub>eq</sub>     | 3.00 (overlapped)                                                  |                                        |                 |
| 4a                  |                                                                    | 136.0                                  | C               |
| 5                   | 6.92 (s)                                                           | 101.2                                  | CH              |
| 6                   |                                                                    | 159.7                                  | C               |
| 7                   |                                                                    | 110.6                                  | C               |
| 7-CH <sub>3</sub>   | 2.16 (s)                                                           | 7.51                                   | CH <sub>3</sub> |
| 8                   |                                                                    | 155.8                                  | C               |
| 8a                  |                                                                    | 107.5                                  | C               |
| 9                   |                                                                    | 164.0                                  | C               |
| 9a                  |                                                                    | 108.1                                  | C               |
| 10                  | 6.88 (s)                                                           | 116.6                                  | CH              |
| 10a                 |                                                                    | 138.7                                  | C               |
| 1'                  | 4.87 d (1.1)                                                       | 81.1                                   | CH              |
| 1'-OCH <sub>3</sub> | 3.47 (s)                                                           | 58.3                                   | CH <sub>3</sub> |
| 2'                  |                                                                    | 210.9                                  | C               |
| 3'                  | 4.30 (overlapped with 4')                                          | 78.8                                   | CH              |
| 4'                  | 4.30 (overlapped with 3')                                          | 68.0                                   | CH              |
| 5'                  | 1.29 d (5.9)                                                       | 19.2                                   | CH <sub>3</sub> |
| <hr/>               |                                                                    |                                        |                 |
| 1A                  | 5.39 dd (9.4, 1.6)                                                 | 98.5                                   |                 |
| 2A <sub>ax</sub>    | 1.90 m (complex signal)                                            | 30.2                                   |                 |
| 2A <sub>eq</sub>    | 2.10 (overlapped with 2A <sub>eq</sub> )                           |                                        |                 |
| 3A <sub>ax</sub>    | 1.65 (overlapped with 2C <sub>ax</sub> )                           | 30.6                                   |                 |
| 3A <sub>eq</sub>    | 2.10 (overlapped with 2A <sub>eq</sub> )                           |                                        |                 |
| 4A                  | 3.30 m (partially overlapped with 5C)                              | 70.4                                   |                 |
| 5A                  | 3.58 dq (8.6, 6.2)                                                 | 76.3                                   |                 |
| 6A                  | 1.29 d (6.2)                                                       | 17.8                                   |                 |
| <hr/>               |                                                                    |                                        |                 |
| 1C                  | 5.14 d (9.7, 1.7)                                                  | 100.5                                  |                 |
| 2C <sub>ax</sub>    | 1.65 (overlapped with 3A <sub>ax</sub> )                           | 37.6                                   |                 |
| 2C <sub>eq</sub>    | 2.53 ddd (12.4, 5.2, 1.7)                                          |                                        |                 |
| 3C                  | 3.70 (overlapped with 5D)                                          | 81.3                                   |                 |
| 4C                  | 3.00 (overlapped)                                                  | 75.3                                   |                 |
| 5C                  | 3.32 dq partially overlapped (9.1, 6.0)                            | 72.2                                   |                 |
| 6C                  | 1.33 d (6.0)                                                       | 16.1                                   |                 |
| <hr/>               |                                                                    |                                        |                 |
| 1D                  | 4.70 d partially overlapped with OH (8.5)                          | 100.0                                  |                 |
| 2D <sub>ax</sub>    | 1.77 brq (11.9)                                                    | 34.8                                   |                 |
| 2D <sub>eq</sub>    | 1.94 brdd (12.4, 4.4)                                              |                                        |                 |
| 3D                  | 3.82 m (signal not resolved)                                       | 68.5                                   |                 |
| 4D                  | 3.54 brt (3.4)                                                     | 69.8                                   |                 |
| 5D                  | 3.70 (overlapped with 3C)                                          | 71.0                                   |                 |
| 6D                  | 1.32 d (6.8)                                                       | 17.6                                   |                 |

**Table S3:** NMR data for deoliosyl-demycarosyl-3C- $\beta$ -D-amicetosyl-MTM (7) in acetone- $d_6$  ( $^1\text{H}$ , 600 MHz)

| Position            | $^1\text{H}$ -NMR ( $\delta$ in ppm, multiplicity, $J$ (H,H) in Hz) |
|---------------------|---------------------------------------------------------------------|
| 1                   |                                                                     |
| 2                   | 4.80 signal not resolved                                            |
| 3                   | 2.80 (overlapped)                                                   |
| 4 <sub>ax</sub>     | 2.70 brd (15.1)                                                     |
| 4 <sub>eq</sub>     | 3.00 (overlapped)                                                   |
| 4a                  |                                                                     |
| 5                   | 6.94 (s)                                                            |
| 6                   |                                                                     |
| 7                   |                                                                     |
| 7-CH <sub>3</sub>   | 2.16 (s)                                                            |
| 8                   |                                                                     |
| 8a                  |                                                                     |
| 9                   |                                                                     |
| 9a                  |                                                                     |
| 10                  | 6.90 (s)                                                            |
| 10a                 |                                                                     |
| 1'                  | 4.86 brs                                                            |
| 1'-OCH <sub>3</sub> | 3.46 (s)                                                            |
| 2'                  |                                                                     |
| 3'                  | 4.30 (overlapped with 4')                                           |
| 4'                  | 4.30 (overlapped with 3')                                           |
| 5'                  | 1.27 d (6.0)                                                        |
| 1A                  | 5.42 brd (10.0)                                                     |
| 2A <sub>ax</sub>    | 1.95 (overlapped with 2D <sub>eq</sub> )                            |
| 2A <sub>eq</sub>    | 2.48 brdd (11.6, 3.8)                                               |
| 3A                  | 3.77 ddd partially overlapped with OH (12.0, 8.8, 5.6)              |
| 4A                  | 3.07 t (8.8)                                                        |
| 5A                  | 3.55 dq partially overlapped (8.8, 6.0)                             |
| 6A                  | 1.33 d (6.0)                                                        |
| 1B                  | 4.76 dd (9.8, 1.9)                                                  |
| 2B <sub>ax</sub>    | 1.60 (overlapped)                                                   |
| 2B <sub>eq</sub>    | 2.20 ddd (12.2 4.9, 1.9)                                            |
| 3B                  | 3.59 ddd partially overlapped (12.2, 9.3, 4.9)                      |
| 4B                  | 3.00 (overlapped with 4C)                                           |
| 5B                  | 3.40 (overlapped with 5D)                                           |
| 6B                  | 1.31 d (6.1)                                                        |
| 1C                  | 5.15 brd (8.8)                                                      |
| 2C <sub>ax</sub>    | 1.60 (overlapped)                                                   |
| 2C <sub>eq</sub>    | 2.53 brdd (12.0, 4.5)                                               |
| 3C                  | 3.72 m (signal not resolved)                                        |
| 4C                  | 3.00 (overlapped with 4B)                                           |
| 5C                  | 3.33 dq (9.0, 6.0)                                                  |
| 6C                  | 1.32 d (6.0)                                                        |
| 1D                  | 4.66 d partially overlapped with OH (8.2)                           |
| 2D <sub>ax</sub>    | 1.60 (overlapped)                                                   |

|                  |                                          |
|------------------|------------------------------------------|
| 2D <sub>eq</sub> | 1.95 (overlapped with 2A <sub>ax</sub> ) |
| 3D <sub>ax</sub> | 1.60 (overlapped)                        |
| 3D <sub>eq</sub> | 2.05 (overlapped)                        |
| 4D               | 3.20 m (signal not resolved)             |
| 5D               | 3.40 (overlapped with 5B)                |
| 6D               | 1.28 d (6.4)                             |

**Table S4:** NMR data for dideoivosyl-6-β-D-amicetosyl-deoliosyl-demycarosyl-3C-β-D-amicetosyl-MTM (**8**) in acetone-*d*<sub>6</sub> (<sup>1</sup>H, 600 MHz)

| Position            | <sup>1</sup> H-NMR (δ in ppm, multiplicity, <i>J</i> (H,H) in Hz) |
|---------------------|-------------------------------------------------------------------|
| 1                   |                                                                   |
| 2                   | 4.80 brs                                                          |
| 3                   | 2.80 (overlapped)                                                 |
| 4 <sub>ax</sub>     | 2.69 dd (16.8, 3.6)                                               |
| 4 <sub>eq</sub>     | 3.00 (overlapped with 4C)                                         |
| 4a                  |                                                                   |
| 5                   | 6.92 (s)                                                          |
| 6                   |                                                                   |
| 7                   |                                                                   |
| 7-CH <sub>3</sub>   | 2.16 (s)                                                          |
| 8                   |                                                                   |
| 8a                  |                                                                   |
| 9                   |                                                                   |
| 9a                  |                                                                   |
| 10                  | 6.88 (s)                                                          |
| 10a                 |                                                                   |
| 1'                  | 4.86 brs                                                          |
| 1'-OCH <sub>3</sub> | 3.47 (s)                                                          |
| 2'                  |                                                                   |
| 3'                  | 4.30 (overlapped with 4')                                         |
| 4'                  | 4.30 (overlapped with 3')                                         |
| 5'                  | 1.28 d (6.2)                                                      |
| 1A                  | 5.38 brd (8.8)                                                    |
| 2A <sub>ax</sub>    | 1.90 m (signal not resolved)                                      |
| 2A <sub>eq</sub>    | 2.10 (overlapped)                                                 |
| 3A <sub>ax</sub>    | 1.55 (overlapped)                                                 |
| 3A <sub>eq</sub>    | 2.10 (overlapped)                                                 |
| 4A                  | 3.28 m (signal not resolved)                                      |
| 5A                  | 3.58 dq (8.4, 6.4)                                                |
| 6A                  | 1.31 d (6.4)                                                      |
| 1C                  | 5.15 brd (9.2)                                                    |
| 2C <sub>ax</sub>    | 1.65 brq partially overlapped (12.0)                              |
| 2C <sub>eq</sub>    | 2.54 brdd (12.0, 5.4)                                             |
| 3C                  | 3.72 ddd (11.8, 8.5, 5.4)                                         |
| 4C                  | 3.00 (overlapped with 4 <sub>eq</sub> )                           |
| 5C                  | 3.33 dq partially overlapped with 4A (9.0, 5.9)                   |
| 6C                  | 1.32 d (5.9)                                                      |
| 1D                  | 4.66 brs                                                          |



|                  |                              |
|------------------|------------------------------|
| 2D <sub>ax</sub> | 1.55 (overlapped)            |
| 2D <sub>eq</sub> | 1.55 (overlapped)            |
| 3D <sub>ax</sub> | 1.55 (overlapped)            |
| 3D <sub>eq</sub> | 1.95 m partially overlapped  |
| 4D               | 3.20 m (signal not resolved) |
| 5D               | 3.40 dq (9.0, 6.1)           |
| 6D               | 1.29 d (6.1)                 |

**Table S5:** NMR data for demycarosyl-3D-β-D-digitoxosyl-MTM-SK (**9**) in acetone-*d*<sub>6</sub> (<sup>1</sup>H, 600 MHz; <sup>13</sup>C, 150 MHz)

| Position            | <sup>1</sup> H-NMR (δ in ppm, multiplicity, <i>J</i> (H,H) in Hz) | <sup>13</sup> C-NMR (δ in ppm) | Multiplicity    |
|---------------------|-------------------------------------------------------------------|--------------------------------|-----------------|
| 1                   |                                                                   | 202.1                          | C               |
| 2                   | 4.76 d (11.3)                                                     | 78.0                           | CH              |
| 3                   | 2.50 (overlapped)                                                 | 43.4                           | CH              |
| 4 <sub>ax</sub>     | 3.17 dd (15.7, 3.6)                                               | 29.7                           | CH <sub>2</sub> |
| 4 <sub>eq</sub>     | 3.00 (overlapped)                                                 |                                |                 |
| 4a                  |                                                                   | 135.2                          | C               |
| 5                   | 6.92 (s)                                                          | 101.2                          | CH              |
| 6                   |                                                                   | 159.7                          | C               |
| 7                   |                                                                   | 110.1                          | C               |
| 7-CH <sub>3</sub>   | 2.16 (s)                                                          | 7.6                            | CH <sub>3</sub> |
| 8                   |                                                                   | 152.2                          | C               |
| 8a                  |                                                                   | 107.2                          | C               |
| 9                   |                                                                   | 164.0                          | C               |
| 9a                  |                                                                   | 107.9                          | C               |
| 10                  | 6.92 (s)                                                          | 116.5                          | CH              |
| 10a                 |                                                                   | 138.8                          | C               |
| 1'                  | 4.25 dd (3.4, 1.5)                                                | 78.9                           | CH              |
| 1'-OCH <sub>3</sub> | 3.57 (s)                                                          | 59.6                           | CH <sub>3</sub> |
| 2'                  | 4.32 brd (3.4)                                                    | 79.1                           | CH              |
| 3'                  |                                                                   | 209.5                          | C               |
| 4'                  | 2.34 (s)                                                          | 25.8                           | CH <sub>3</sub> |
| 1A                  | 5.42 dd (9.6, 1.9)                                                | 96.7                           | CH              |
| 2A <sub>ax</sub>    | 1.88 ddd (12.0, 12.0, 9.6)                                        | 37.1                           | CH <sub>2</sub> |
| 2A <sub>eq</sub>    | 2.50 (overlapped)                                                 |                                |                 |
| 3A                  | 3.78 ddd partially overlapped (12.0, 8.9, 5.0)                    | 80.9                           | CH              |
| 4A                  | 3.08 t (8.9)                                                      | 75.0                           | CH              |
| 5A                  | 3.55 (overlapped)                                                 | 72.3                           | CH              |
| 6A                  | 1.34 d (6.1)                                                      | 17.6                           | CH <sub>3</sub> |
| 1B                  | 4.77 dd (9.5, 1.7)                                                | 99.5                           | CH              |
| 2B <sub>ax</sub>    | 1.56 ddd (12.0, 12.0, 9.5)                                        | 39.6                           | CH <sub>2</sub> |
| 2B <sub>eq</sub>    | 2.20 ddd (12.0, 4.9, 1.7)                                         |                                |                 |
| 3B                  | 3.55 (overlapped)                                                 | 71.0                           | CH              |
| 4B                  | 3.00 (overlapped)                                                 | 77.2                           | CH              |
| 5B                  | 3.40 dq (9.2, 6.2)                                                | 72.3                           | CH              |
| 6B                  | 1.32 d (6.2)                                                      | 17.2                           | CH <sub>3</sub> |
| 1C                  | 5.14 dd (9.6, 1.6)                                                | 100.4                          | CH              |
| 2C <sub>ax</sub>    | 1.62 ddd (12.1, 12.0, 9.6)                                        | 37.5                           | CH <sub>2</sub> |

|                  |                            |      |                 |
|------------------|----------------------------|------|-----------------|
| 2C <sub>eq</sub> | 2.50 (overlapped)          |      |                 |
| 3C               | 3.70 (overlapped)          | 81.4 | CH              |
| 4C               | 3.00 (overlapped)          | 75.3 | CH              |
| 5C               | 3.33 dq (8.9, 6.4)         | 72.3 | CH              |
| 6C               | 1.33 d (6.4)               | 17.2 | CH <sub>3</sub> |
| 1D               | 4.70 dd (9.5, 1.5)         | 99.8 | CH              |
| 2D <sub>ax</sub> | 1.81 ddd (12.0, 12.0, 9.5) | 32.1 | CH <sub>2</sub> |
| 2D <sub>eq</sub> | 1.96 (signal not resolved) |      |                 |
| 3D               | 3.90 dt (11.9, 4.0)        | 76.5 | CH              |
| 4D               | 3.70 (overlapped)          | 68.5 | CH              |
| 5D               | 3.70 (overlapped)          | 70.6 | CH              |
| 6D               | 1.31 d (6.2)               | 16.1 | CH <sub>3</sub> |
| 1E               | 5.03 dd (9.6, 1.9)         | 96.9 | CH              |
| 2E <sub>ax</sub> | 1.70 ddd (13.0, 9.6, 2.9)  | 38.3 | CH <sub>2</sub> |
| 2E <sub>eq</sub> | 1.92 ddd (13.0, 2.0, 1.9)  |      |                 |
| 3E               | 4.05 brs                   | 67.8 | CH              |
| 4E               | 3.20 dd (9.5, 2.9)         | 72.8 | CH              |
| 5E               | 3.70 (overlapped)          | 69.6 | CH              |
| 6E               | 1.23 d (6.2)               | 16.1 | CH <sub>3</sub> |

**Table S6:** NMR data for demycarosyl-MTM-SDK (**10**) in acetone-*d*<sub>6</sub> (<sup>1</sup>H, 600 MHz; <sup>13</sup>C, 150 MHz)

| Position            | <sup>1</sup> H-NMR (δ in ppm, multiplicity, <i>J</i> (H,H) in Hz) | <sup>13</sup> C-NMR (δ in ppm) | Multiplicity    |
|---------------------|-------------------------------------------------------------------|--------------------------------|-----------------|
| 1                   |                                                                   | 204.1                          | C               |
| 2                   | 4.76 (overlapped with 1B)                                         | 76.9                           | CH              |
| 3                   | 2.74 t (12.1)                                                     | 42.3                           | C               |
| 4 <sub>ax</sub>     | 2.95 (overlapped)                                                 | 27.3                           | CH <sub>2</sub> |
| 4 <sub>eq</sub>     | 2.64 d (15.5)                                                     |                                |                 |
| 4a                  |                                                                   | 135.5                          | C               |
| 5                   | 6.90 (s)                                                          | 100.9                          | CH              |
| 6                   |                                                                   | 159.5                          | C               |
| 7                   |                                                                   | 110.3                          | C               |
| 7-CH <sub>3</sub>   | 2.18 (s)                                                          | 7.5                            | CH <sub>3</sub> |
| 8                   |                                                                   | 152.4                          | C               |
| 8a                  |                                                                   | 107.4                          | C               |
| 9                   |                                                                   | 164.5                          | C               |
| 9a                  |                                                                   | 107.9                          | C               |
| 10                  | 6.90 (s)                                                          | 116.3                          | CH              |
| 10a                 |                                                                   | 138.5                          | C               |
| 1'                  | 5.07 d (2.0)                                                      | 79.6                           | CH              |
| 1'-OCH <sub>3</sub> | 3.45 (s)                                                          | 58.4                           | CH <sub>3</sub> |
| 2'                  |                                                                   | 198.3                          | C               |
| 3'                  |                                                                   | 198.3                          | C               |
| 4'                  | 2.34 (s)                                                          | 23.6                           | CH <sub>3</sub> |
| 1A                  | 5.39 d (9.7)                                                      | 96.8                           | CH              |
| 2A <sub>ax</sub>    | 1.87 brq (11.9)                                                   | 37.1                           | CH <sub>2</sub> |
| 2A <sub>eq</sub>    | 2.48 brdd (11.3, 4.9)                                             |                                |                 |
| 3A                  | 3.80 (overlapped with 3D)                                         | 81.3                           | CH              |
| 4A                  | 3.08 t (9.0)                                                      | 74.9                           | CH              |

|                  |                                 |       |                 |
|------------------|---------------------------------|-------|-----------------|
| 5A               | 3.55 (overlapped with 4D)       | 72.2  | CH              |
| 6A               | 1.34 d (6.1)                    | 17.5  | CH <sub>3</sub> |
| 1B               | 4.76 (overlapped with 2)        | 99.5  | CH              |
| 2B <sub>ax</sub> | 1.55 ddd (12.0, 12.0, 9.7)      | 39.5  | CH <sub>2</sub> |
| 2B <sub>eq</sub> | 2.21 ddd (12.0, 5.0, 1.7)       |       |                 |
| 3B               | 3.55 (overlapped with 4D)       | 70.9  | CH              |
| 4B               | 3.00 t coincident with 4C (8.9) | 77.1  | CH              |
| 5B               | 3.39 dq (8.9, 5.9)              | 72.2  | CH              |
| 6B               | 1.31 d (5.9)                    | 17.2  | CH <sub>3</sub> |
| 1C               | 5.10 dd (9.7, 1.6)              | 100.6 | CH              |
| 2C <sub>ax</sub> | 1.63 brq (12.2)                 | 37.5  | CH <sub>2</sub> |
| 2C <sub>eq</sub> | 2.53 ddd (12.0, 5.2, 1,6)       |       |                 |
| 3C               | 3.70 (overlapped with 5D)       | 81.6  | CH              |
| 4C               | 3.00 t coincident with 4B (8.9) | 75.3  | CH              |
| 5C               | 3.31 dq (8.9, 5.6)              | 72.2  | CH              |
| 6C               | 1.33 d (5.6)                    | 17.5  | CH <sub>3</sub> |
| 1D               | 4.69 d (10.0)                   | 100.0 | CH              |
| 2D <sub>ax</sub> | 1.77 brq (11.9)                 | 34.8  | CH <sub>2</sub> |
| 2D <sub>eq</sub> | 1.92 (signal not resolved)      |       |                 |
| 3D               | 3.80 (overlapped with 3A)       | 68.4  | CH              |
| 4D               | 3.55 (overlapped with 5A)       | 69.7  | CH              |
| 5D               | 3.70 (overlapped with 3C)       | 70.9  | CH              |
| 6D               | 1.31 d (6.0)                    | 16.1  | CH <sub>3</sub> |

**Table S7:** NMR data for demycarosyl-3D-β-D-digitoxosyl-MTM-SDK (**11**) in acetone-d<sub>6</sub> (<sup>1</sup>H, 600 MHz; <sup>13</sup>C, 150 MHz)

| Position            | <sup>1</sup> H-NMR (δ in ppm, multiplicity, <i>J</i> (H,H) in Hz) | <sup>13</sup> C-NMR (δ in ppm) | Multiplicity    |
|---------------------|-------------------------------------------------------------------|--------------------------------|-----------------|
| 1                   |                                                                   | 203.8                          | C               |
| 2                   | 4.78 d (13.1)                                                     | 76.8                           | CH              |
| 3                   | 2.74 t (13.1)                                                     | 42.4                           | C               |
| 4 <sub>ax</sub>     | 3.05 (overlapped)                                                 | 27.3                           | CH <sub>2</sub> |
| 4 <sub>eq</sub>     | 2.65 brd (16.3)                                                   |                                |                 |
| 4a                  |                                                                   | 135.8                          | C               |
| 5                   | 6.92 (s)                                                          | 101.2                          | CH              |
| 6                   |                                                                   | 159.6                          | C               |
| 7                   |                                                                   | 110.2                          | C               |
| 7-CH <sub>3</sub>   | 2.15 (s)                                                          | 7.5                            | CH <sub>3</sub> |
| 8                   |                                                                   | 154.0                          | C               |
| 8a                  |                                                                   | 107.2                          | C               |
| 9                   |                                                                   | 164.0                          | C               |
| 9a                  |                                                                   | 108.2                          | C               |
| 10                  | 6.92 (s)                                                          | 116.4                          | CH              |
| 10a                 |                                                                   | 138.6                          | C               |
| 1'                  | 5.06 d (1.4)                                                      | 79.7                           | CH              |
| 1'-OCH <sub>3</sub> | 3.45 (s)                                                          | 58.4                           | CH <sub>3</sub> |
| 2'                  |                                                                   | 198.2                          | C               |
| 3'                  |                                                                   | 198.3                          | C               |
| 4'                  | 2.37 (s)                                                          | 23.7                           | CH <sub>3</sub> |

|                  |                                      |       |                 |
|------------------|--------------------------------------|-------|-----------------|
| 1A               | 5.38 d (9.2)                         | 96.8  | CH              |
| 2A <sub>ax</sub> | 1.89 brq (11.0)                      | 37.1  | CH <sub>2</sub> |
| 2A <sub>eq</sub> | 2.55 dd (12.0, 5.0)                  |       |                 |
| 3A               | 3.75 (overlapped with 4D and 5E)     | 80.9  | CH              |
| 4A               | 3.08 t (9.0)                         | 75.0  | CH              |
| 5A               | 3.54 dq (9.0, 6.1)                   | 72.3  | CH              |
| 6A               | 1.34 d (6.1)                         | 17.8  | CH <sub>3</sub> |
| <hr/>            |                                      |       |                 |
| 1B               | 4.75 dd overlapped with 2 (9.7, 1.4) | 99.5  | CH              |
| 2B <sub>ax</sub> | 1.55 ddd (12.0, 12.0, 9.7)           | 39.6  | CH <sub>2</sub> |
| 2B <sub>eq</sub> | 2.21 ddd (12.0, 4.9, 1.4)            |       |                 |
| 3B               | 3.58 ddd (12.0, 8.9, 4.9)            | 71.0  | CH              |
| 4B               | 3.00 t coincident with 4C (8.9)      | 77.2  | CH              |
| 5B               | 3.40 dq (8.9, 6.2)                   | 72.3  | CH              |
| 6B               | 1.31 d (6.2)                         | 17.2  | CH <sub>3</sub> |
| <hr/>            |                                      |       |                 |
| 1C               | 5.10 d (9.4)                         | 100.6 | CH              |
| 2C <sub>ax</sub> | 1.62 brq (12.0)                      | 37.5  | CH <sub>2</sub> |
| 2C <sub>eq</sub> | 2.55 dd (12.0, 4.8)                  |       |                 |
| 3C               | 3.70 (overlapped with 5D)            | 81.5  | CH              |
| 4C               | 3.00 t coincident with 4B (8.9)      | 75.3  | CH              |
| 5C               | 3.32 dq (8.9, 6.2)                   | 72.3  | CH              |
| 6C               | 1.32 d (6.2)                         | 17.5  | CH <sub>3</sub> |
| <hr/>            |                                      |       |                 |
| 1D               | 4.68 brs                             | 99.9  | CH              |
| 2D <sub>ax</sub> | 1.81 brq (12.0)                      | 32.1  | CH <sub>2</sub> |
| 2D <sub>eq</sub> | 1.95 (signal not resolved)           |       |                 |
| 3D               | 3.90 (signal not resolved)           | 76.5  | CH              |
| 4D               | 3.76 (overlapped with 3A and 5E)     | 68.5  | CH              |
| 5D               | 3.70 brq (overlapped with 3C)        | 70.6  | CH              |
| 6D               | 1.31 d (6.2)                         | 16.1  | CH <sub>3</sub> |
| <hr/>            |                                      |       |                 |
| 1E               | 5.04 dd (9.6, 1.6)                   | 96.9  | CH              |
| 2E <sub>ax</sub> | 1.70 ddd (12.8, 9.6, 2.8)            | 38.3  | CH <sub>2</sub> |
| 2E <sub>eq</sub> | 2.01 dt (12.8, 2.6)                  |       |                 |
| 3E               | 4.05 brd (2.8)                       | 67.8  | CH              |
| 4E               | 3.20 dd (9.2, 2.3)                   | 72.8  | CH              |
| 5E               | 3.75 (overlapped with 3A and 4D)     | 69.6  | CH              |
| 6E               | 1.24 d (6.1)                         | 14.7  | CH <sub>3</sub> |

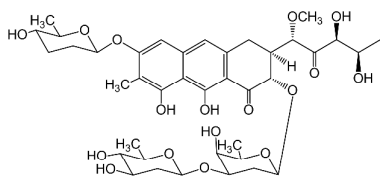

Dideolivosyl-6- $\beta$ -D-amicetosyl-demycarosyl-2-O- $\beta$ -D-olivosyl-3C- $\beta$ -D-olivosyl-mithramycin (**5**)

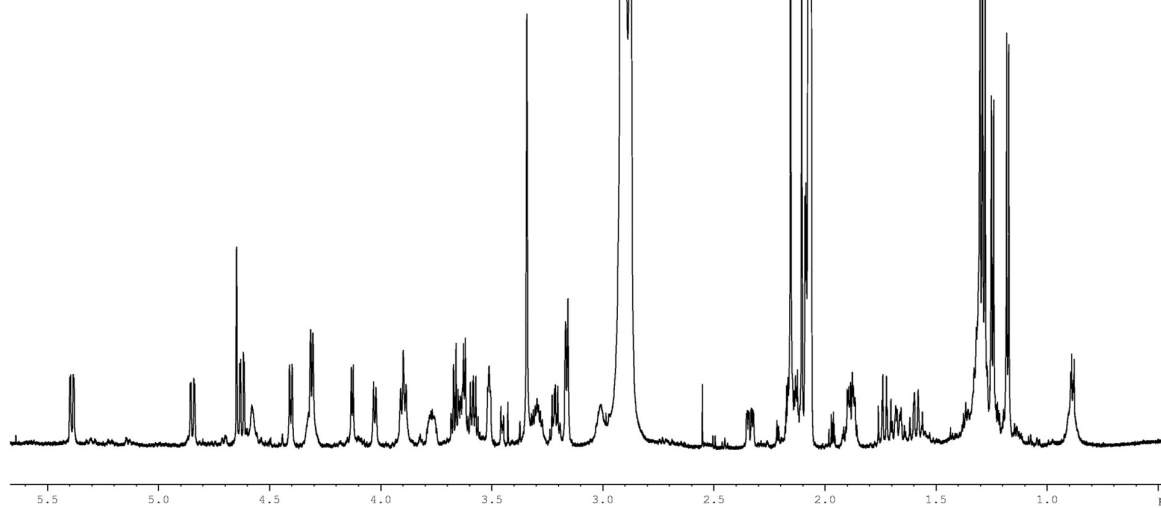

**Figure S8:**  $^1\text{H-NMR}$  expanded chart for **5** in acetone- $d_6$  (600 MHz)

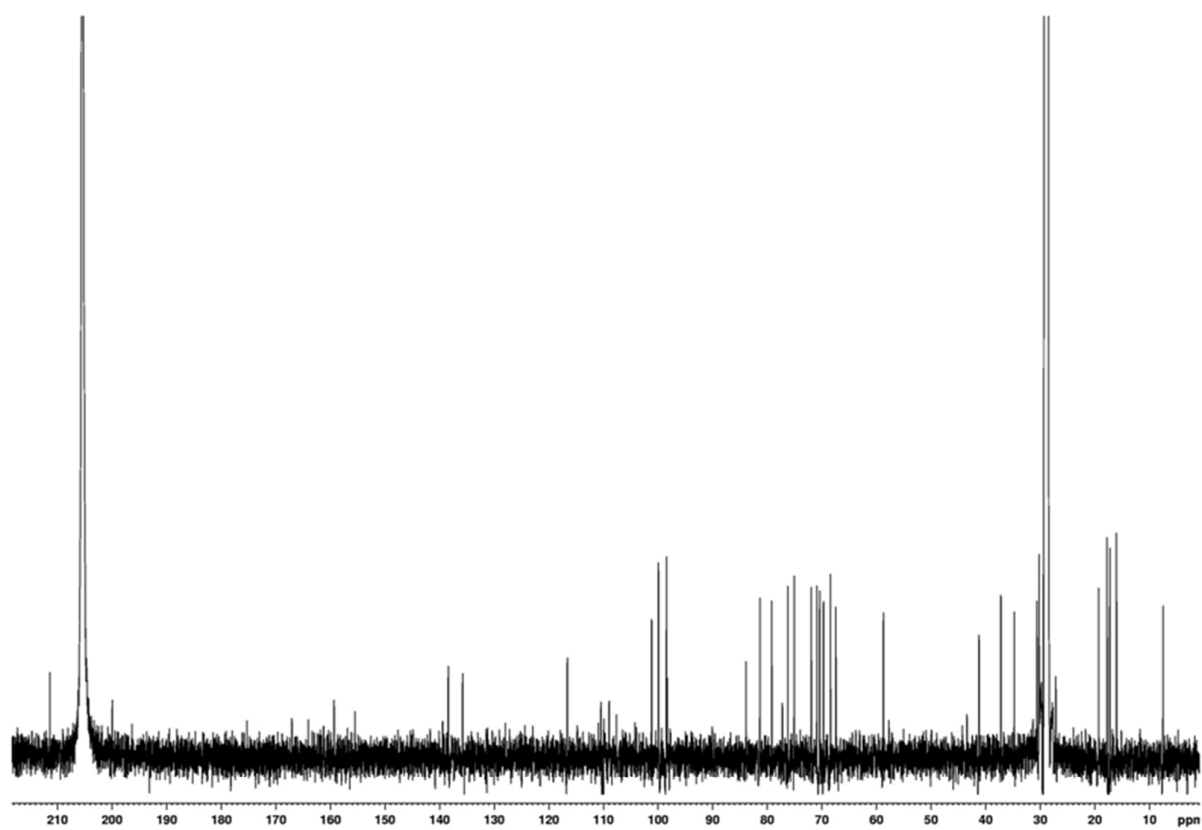

**Figure S9:**  $^{13}\text{C}$ -NMR chart for **5** in acetone- $d_6$  (150 MHz)

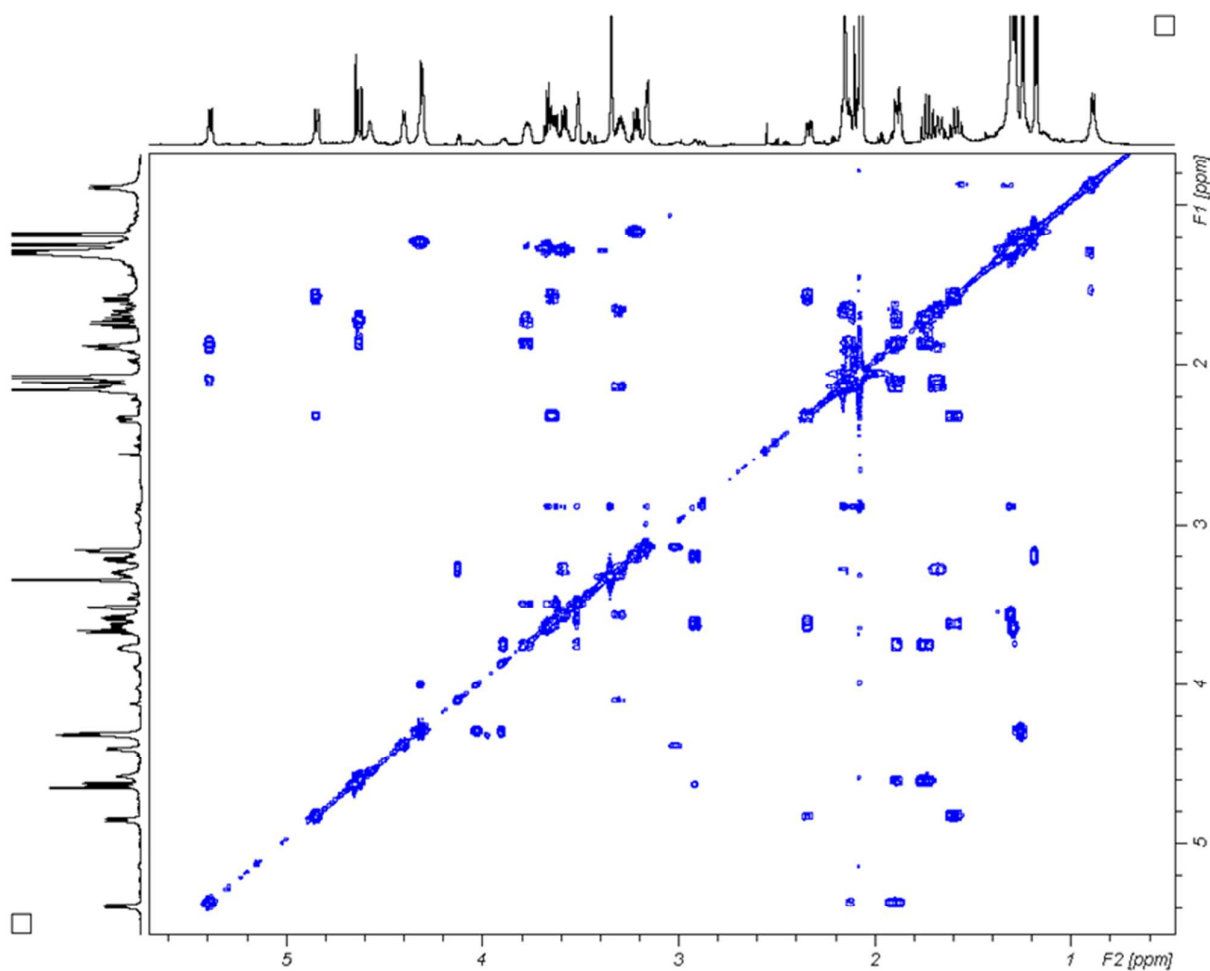

Figure S10: COSY chart for **5** in acetone-*d*<sub>6</sub> (256 points for F1 and F2, 48 transients)

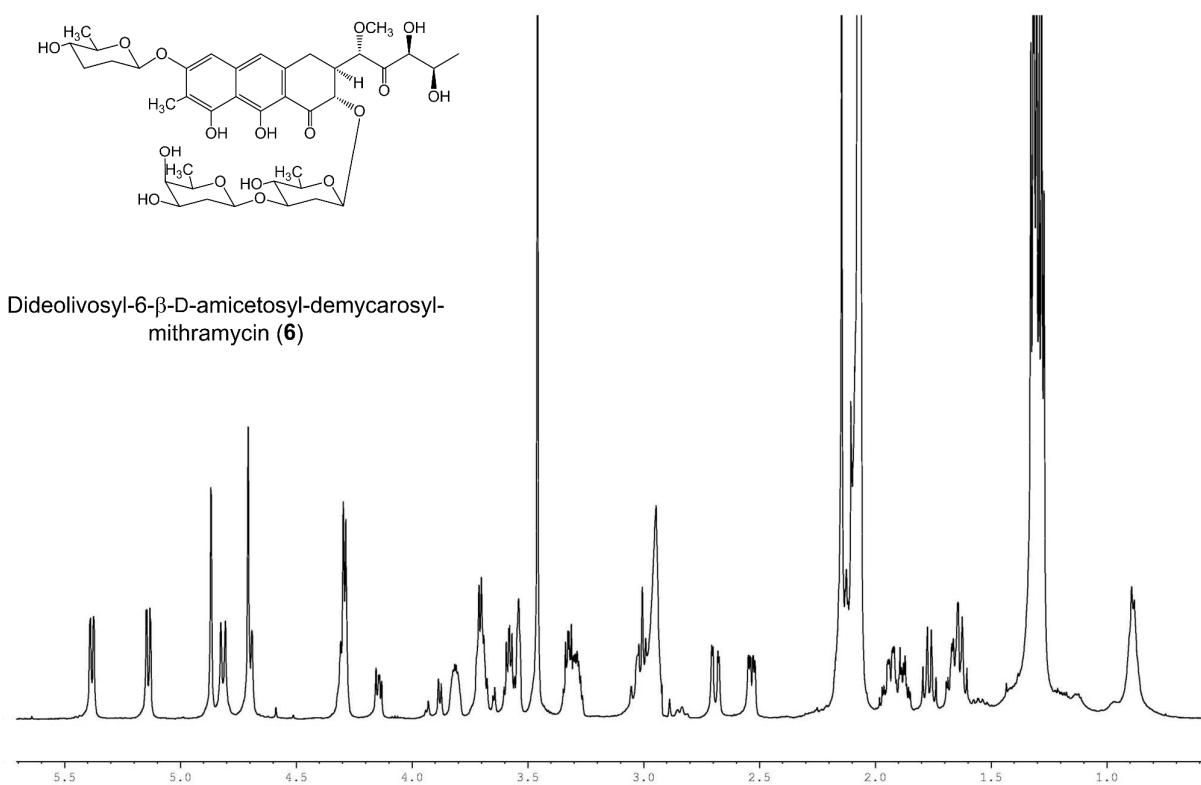

**Figure S11:** <sup>1</sup>H-NMR expanded chart for **6** in acetone-*d*<sub>6</sub> (600 MHz)



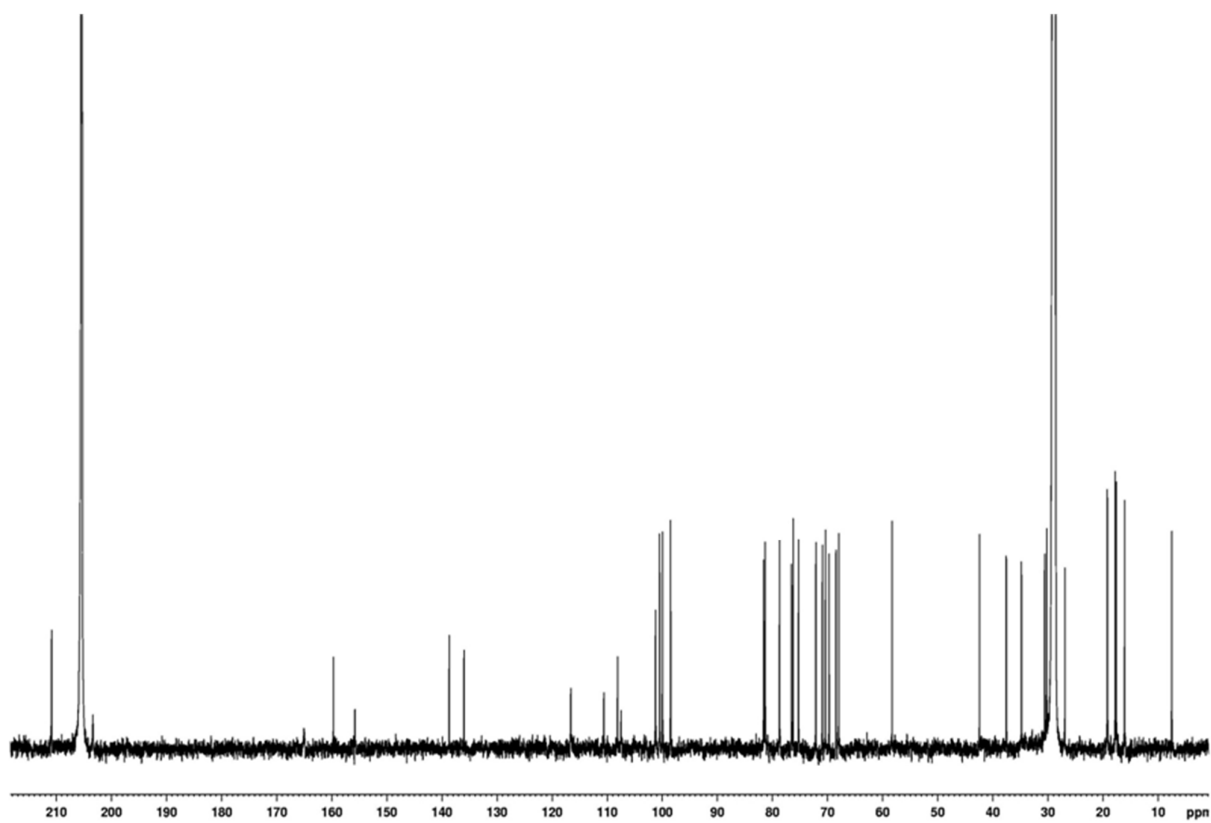

**Figure S12:**  $^{13}\text{C}$ -NMR chart for **6** in acetone- $d_6$  (150 MHz)

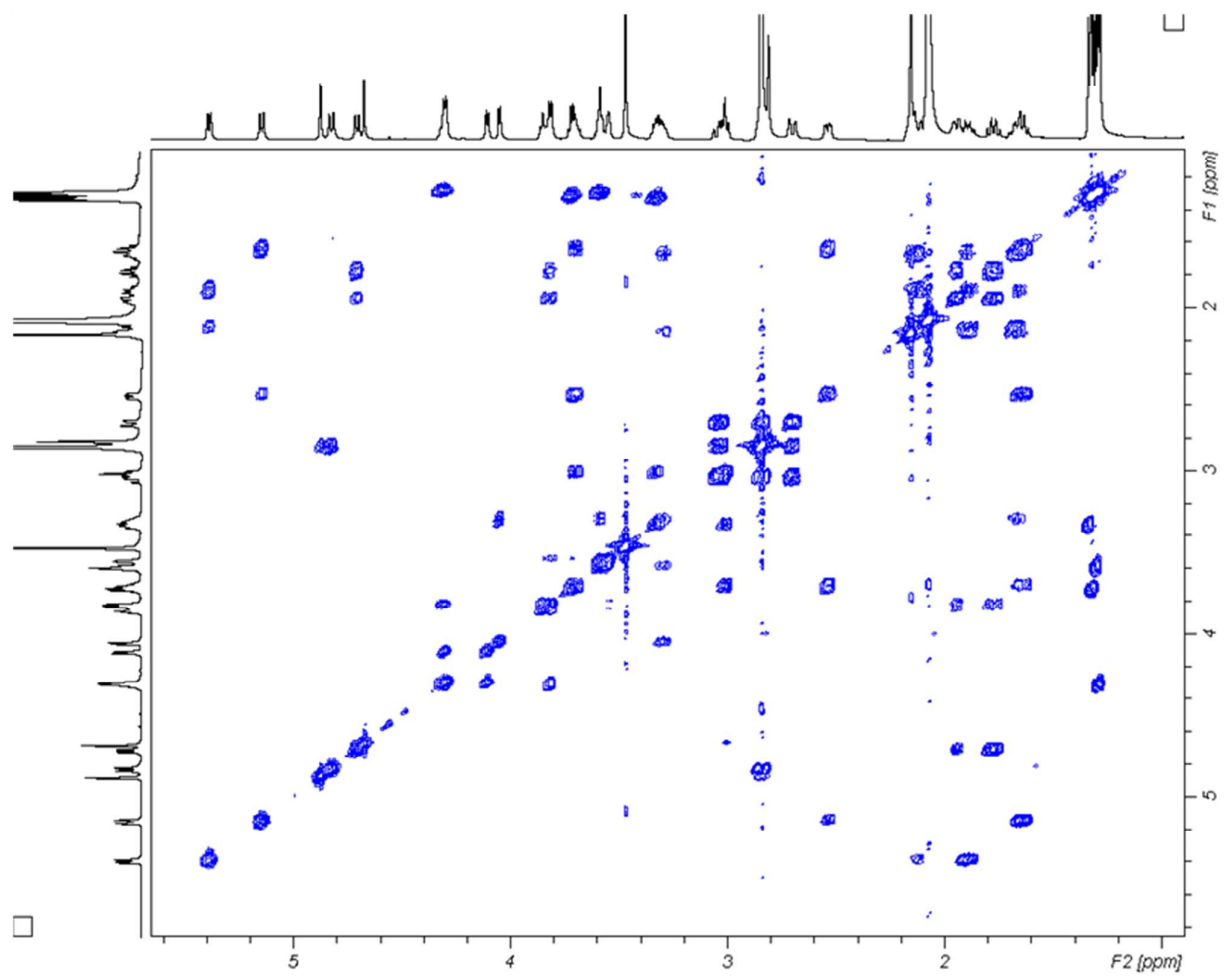

**Figure 13:** COSY chart for **6** in acetone-*d*<sub>6</sub> (256 points for F1 and F2, 48 transients)

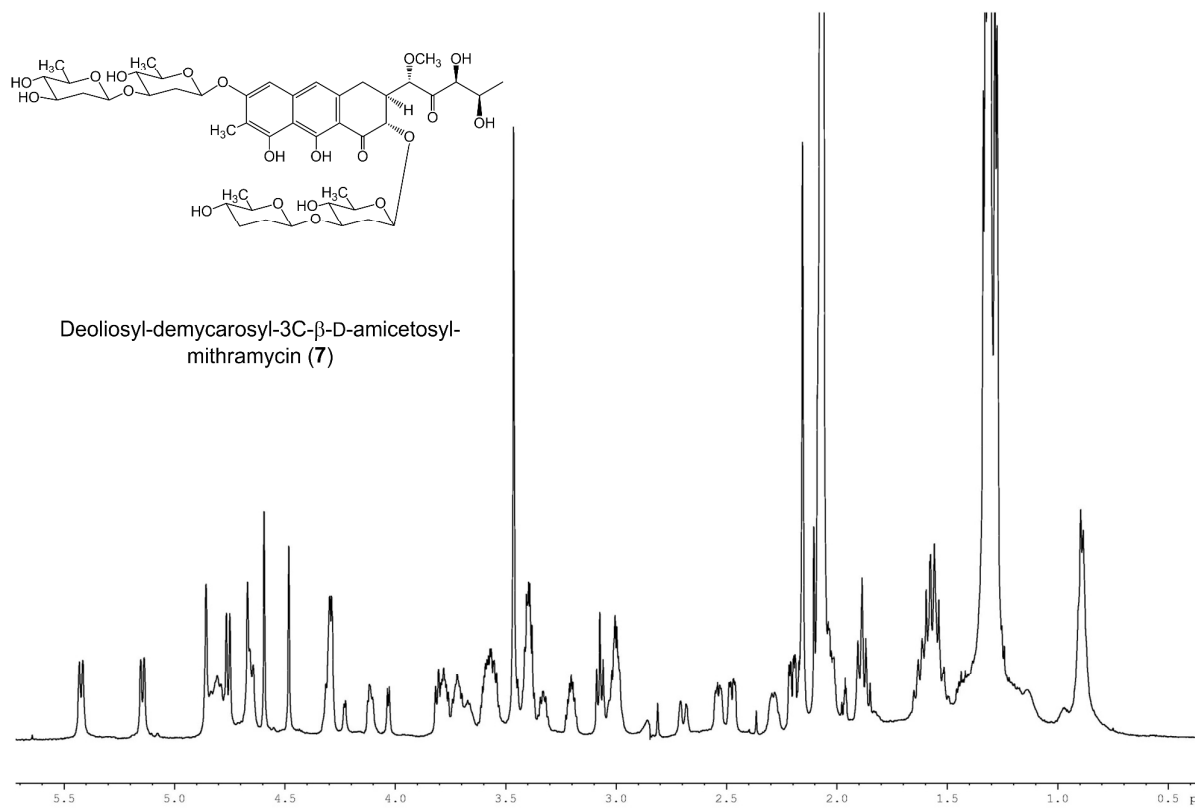

**Figure S14:** <sup>1</sup>H-NMR expanded chart for **7** in acetone-*d*<sub>6</sub> (600 MHz)

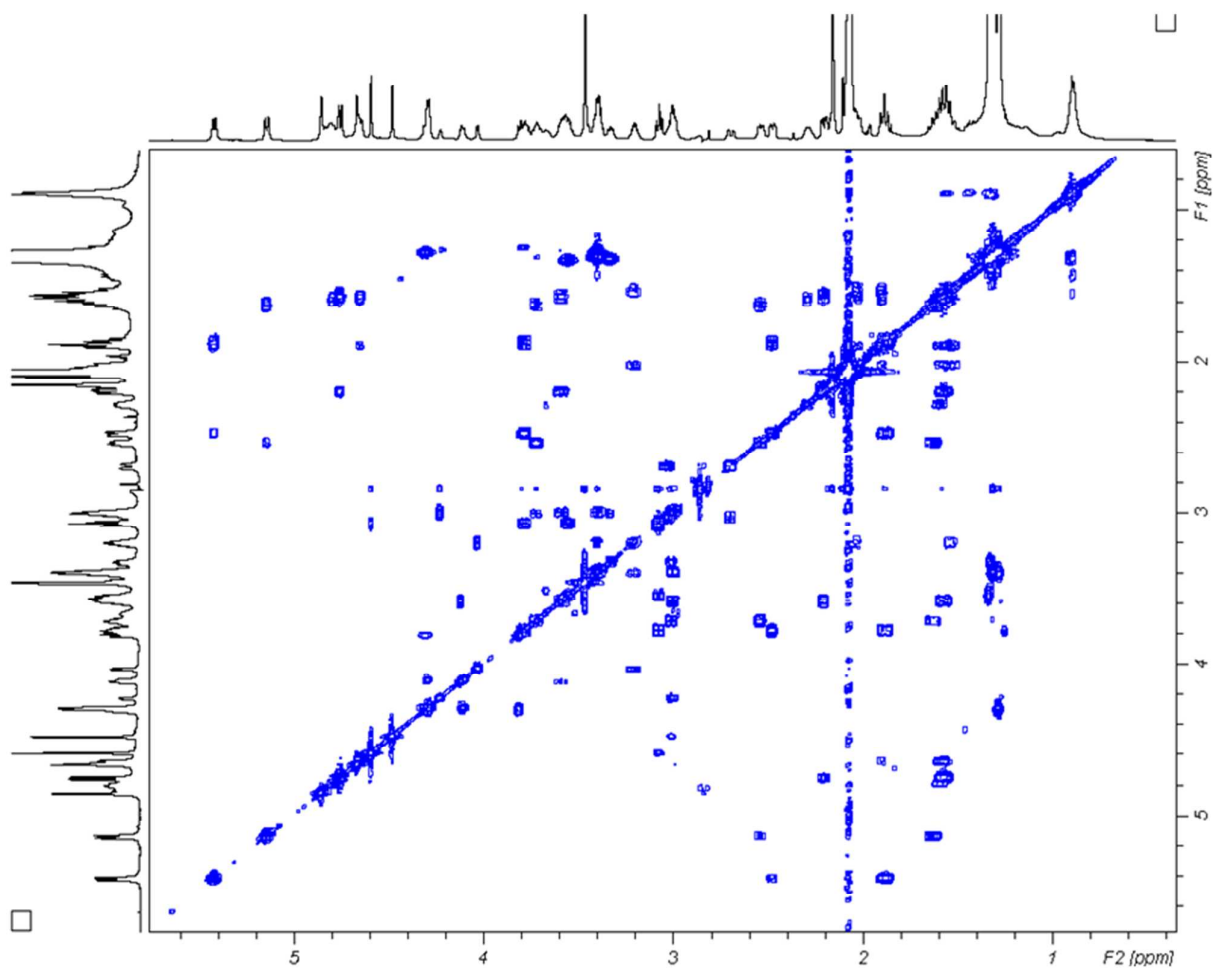

**Figure S15:** COSY chart for **7** in acetone-*d*<sub>6</sub> (256 points for F1 and F2, 48 transients)

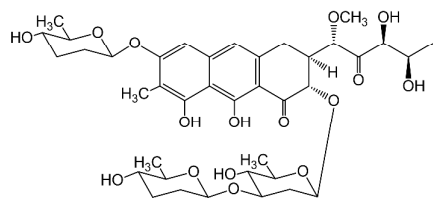

Dideolivosyl-6-β-D-amicetosyl-deoliosyl-demycarosyl-3C-β-D-amicetosyl-mithramycin (**8**)

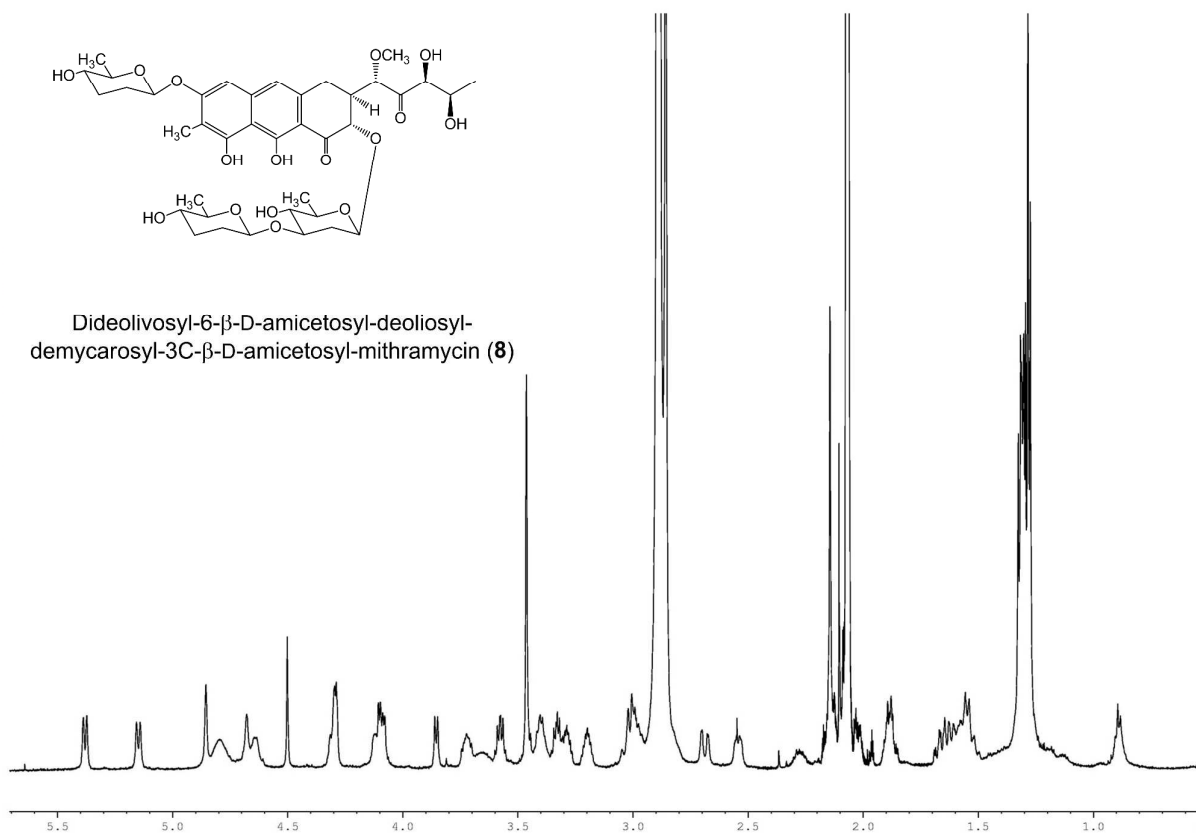

**Figure S16:** <sup>1</sup>H-NMR expanded chart for **8** in acetone-*d*<sub>6</sub> (600 MHz)

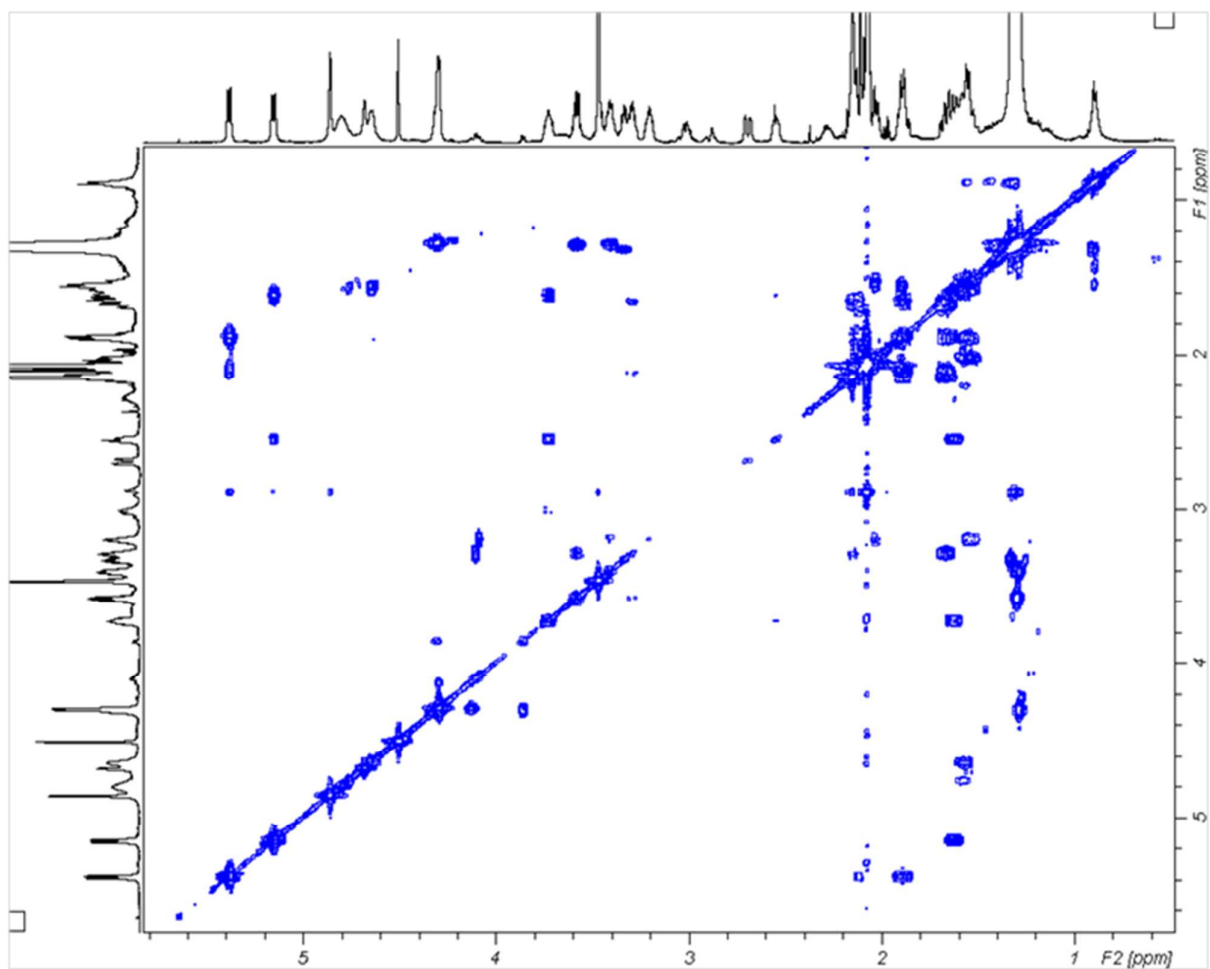

**Figure S17:** COSY chart for **8** in acetone-*d*<sub>6</sub> (256 points for F1 and F2, 48 transients)



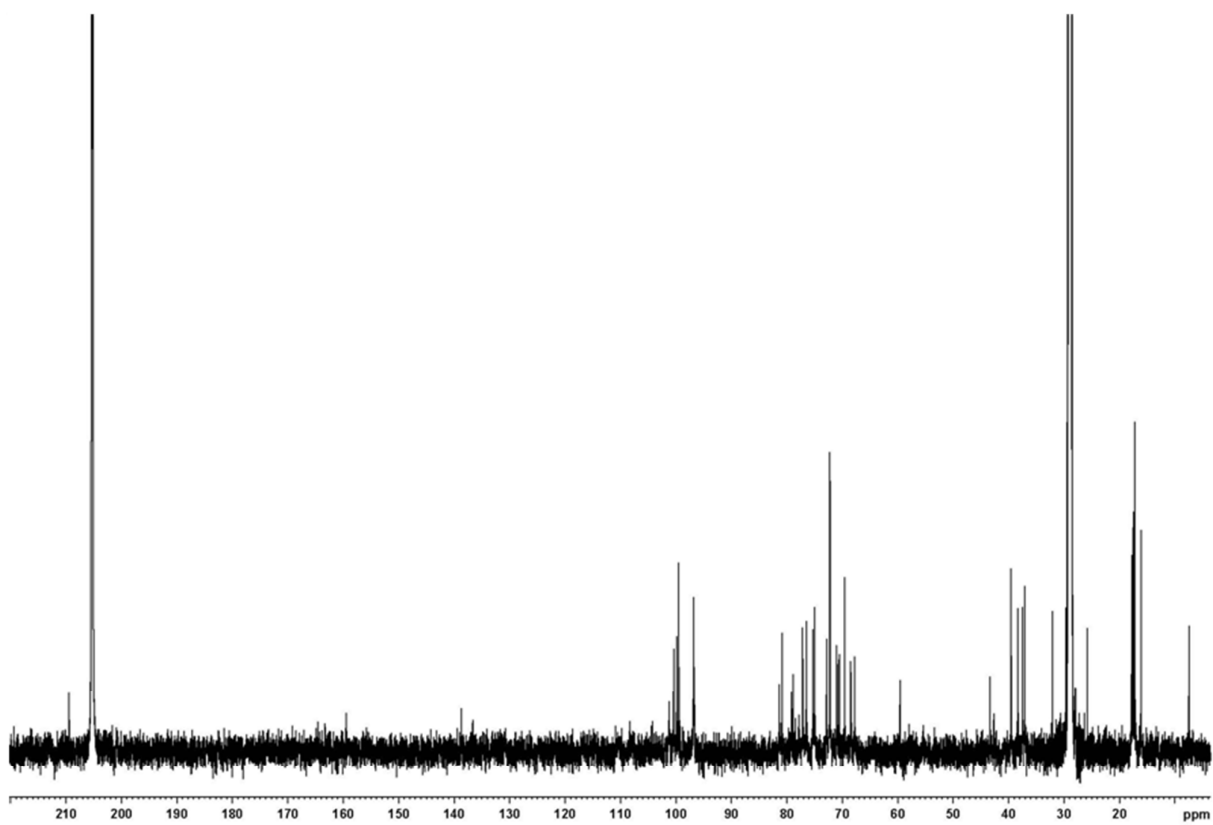

**Figure S19:**  $^{13}\text{C}$ -NMR chart for **9** in acetone- $d_6$  (150 MHz)



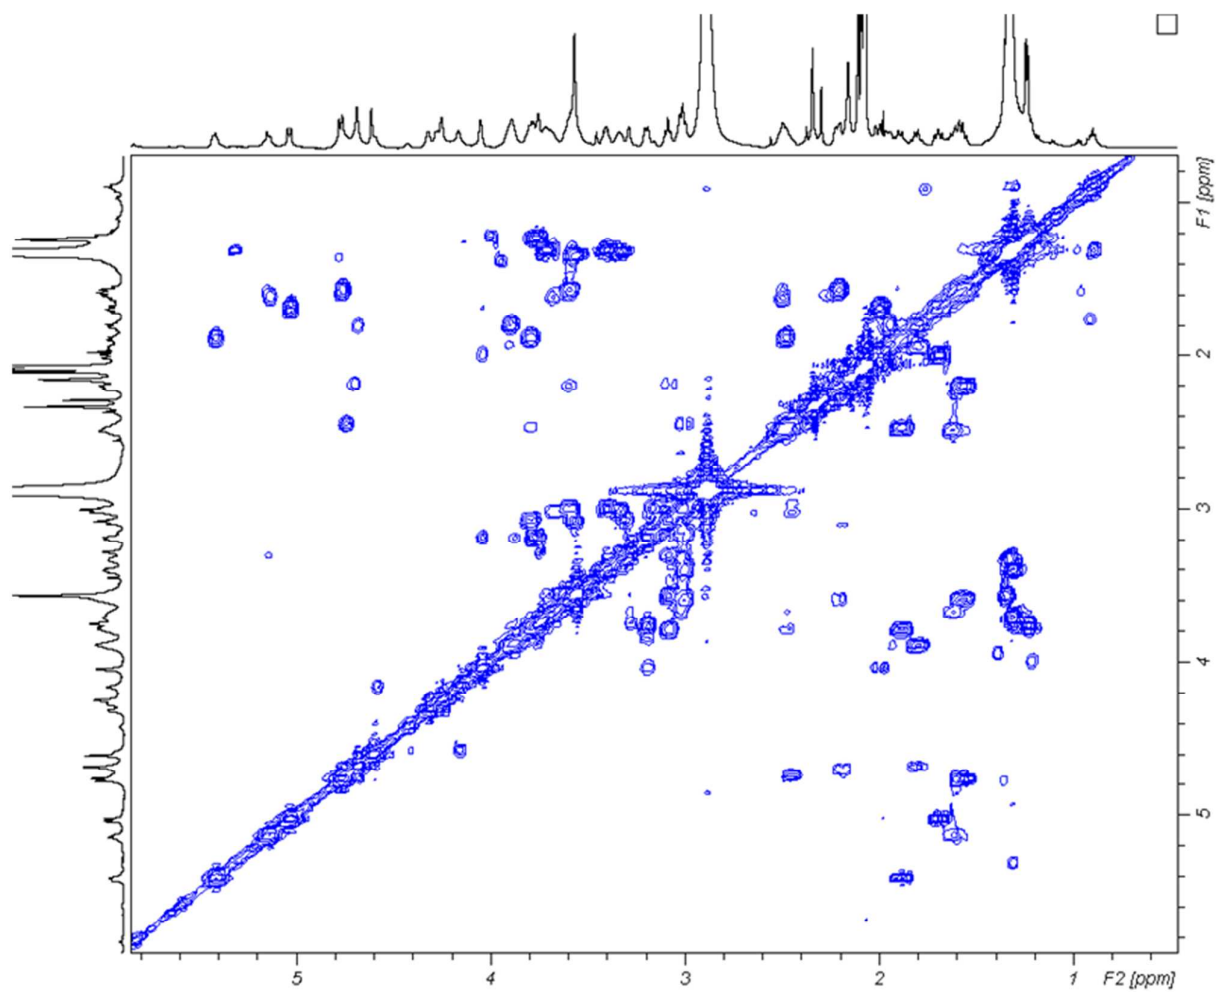

**Figure S20:** COSY chart for **9** in acetone-*d*<sub>6</sub> (256 points for F1 and F2, 48 transients)

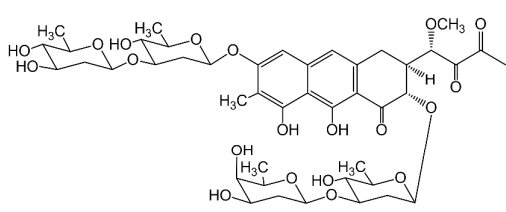

Demycarosyl-mithramycin SDK (10)

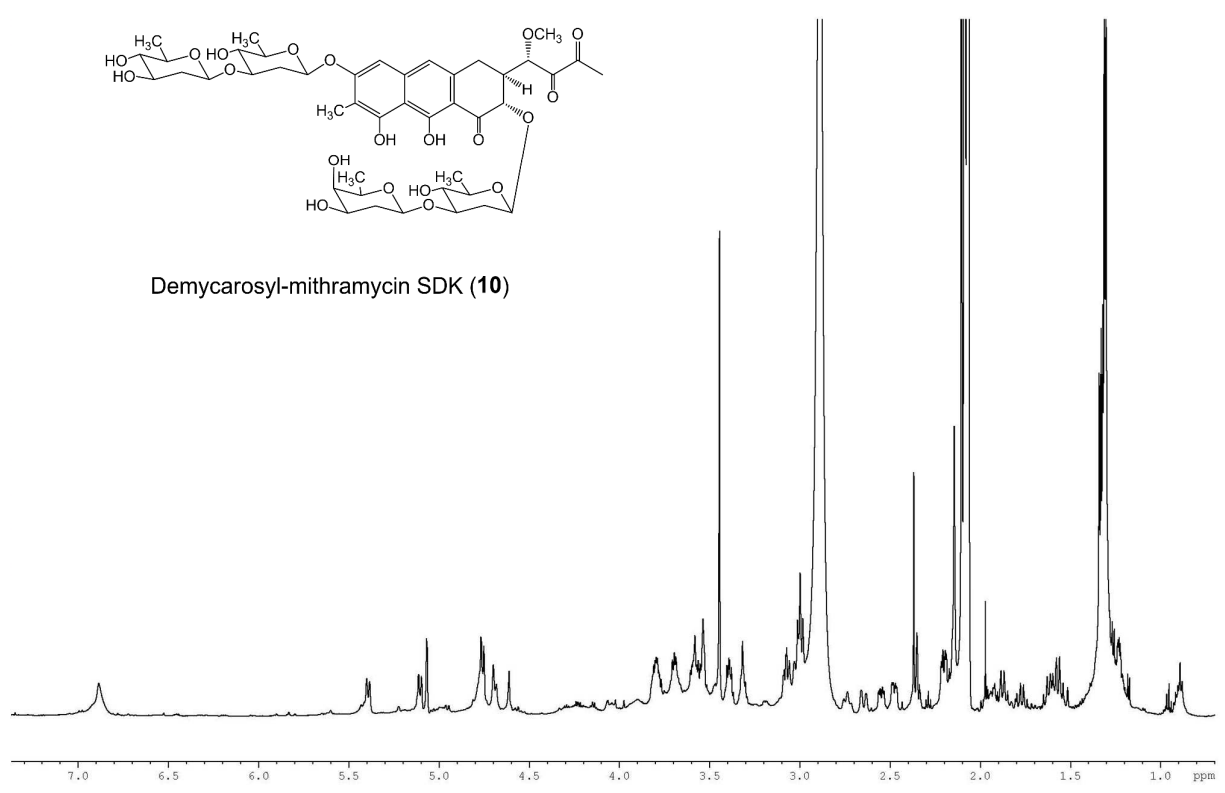

Figure S21: <sup>1</sup>H-NMR expanded chart for 10 in acetone-d<sub>6</sub> (600 MHz)

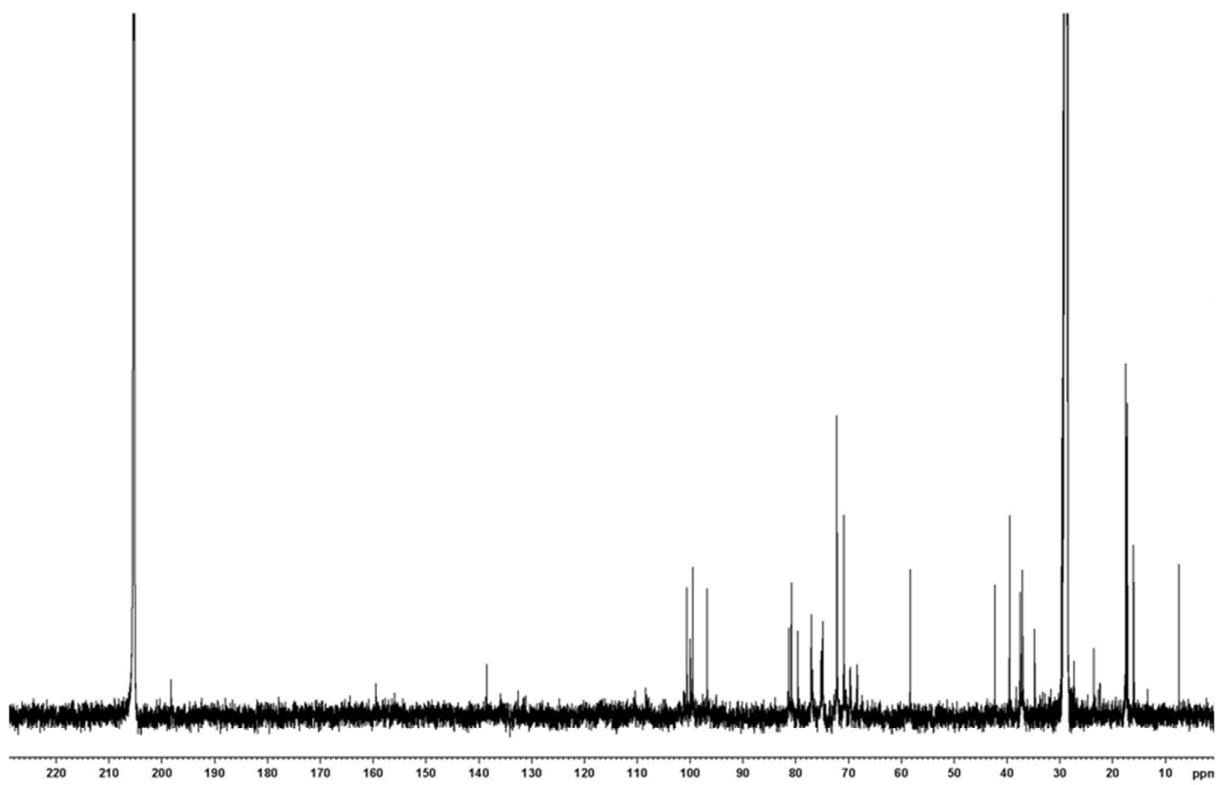

**Figure S22:**  $^{13}\text{C}$ -NMR chart for **10** in acetone- $d_6$  (150 MHz)

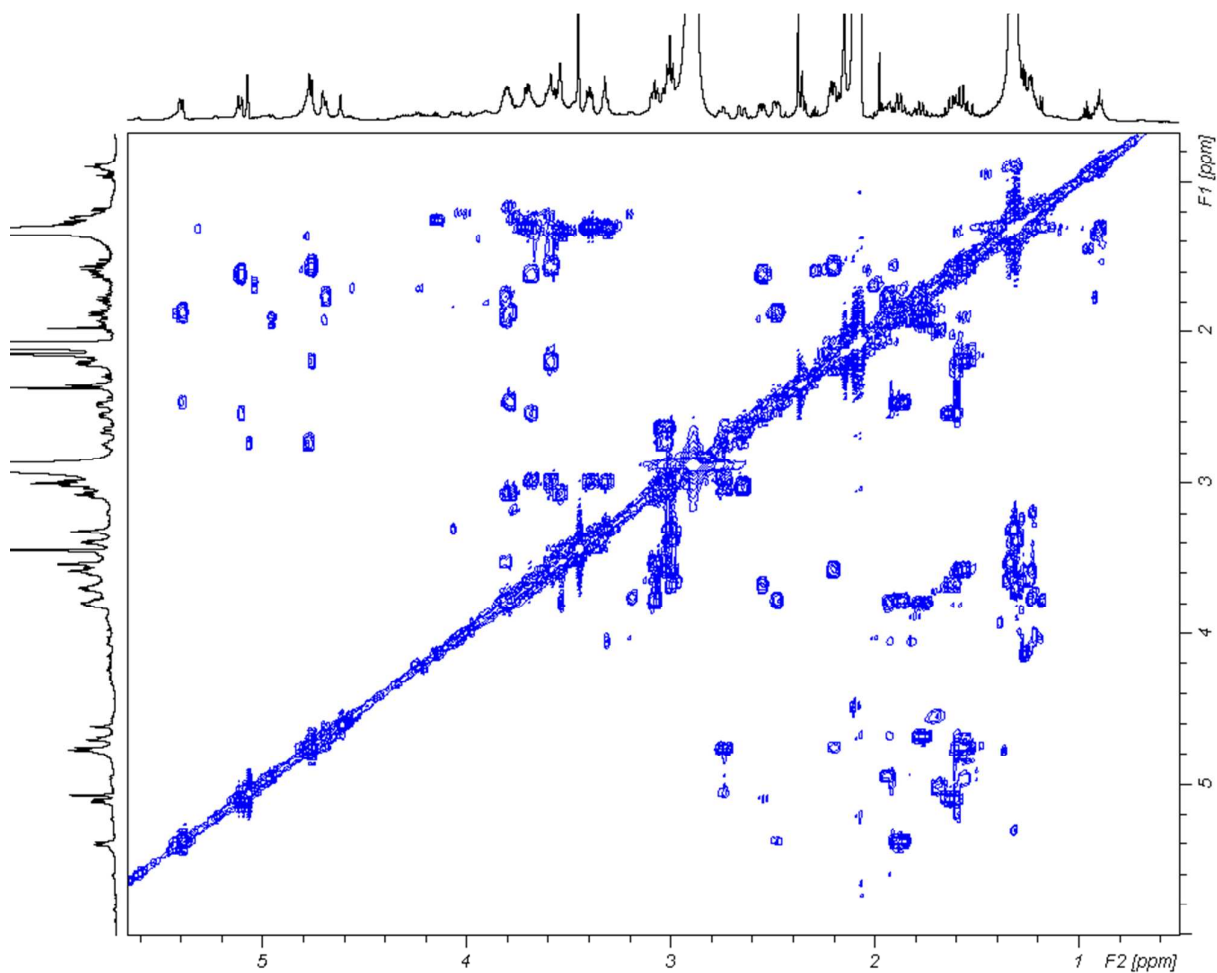

**Figure S23:** COSY chart for **10** in acetone-*d*<sub>6</sub> (256 points for F1 and F2, 48 transients)

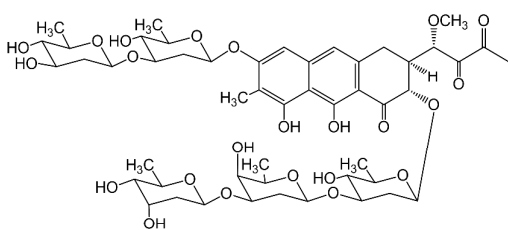

Demycarosyl-3D-β-D-digitoxosyl-mithramycin SDK (11)

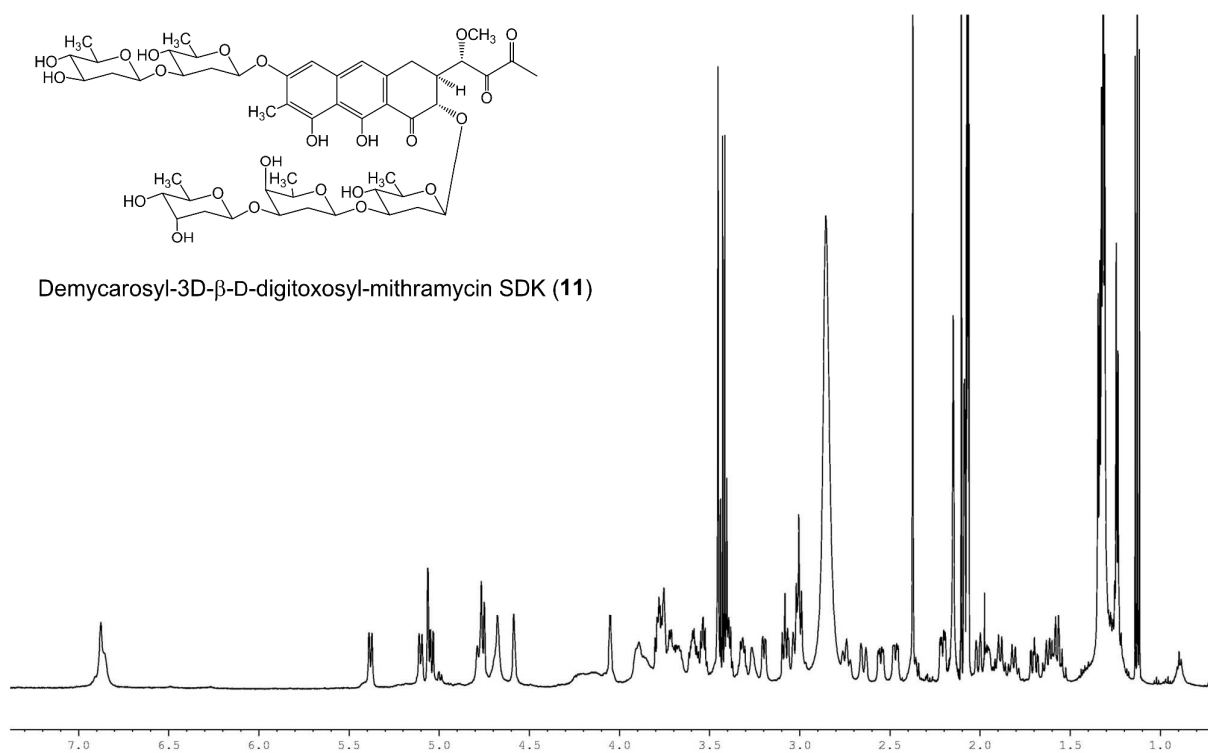

Figure S24: <sup>1</sup>H-NMR expanded chart for 11 in acetone-*d*<sub>6</sub> (600 MHz)

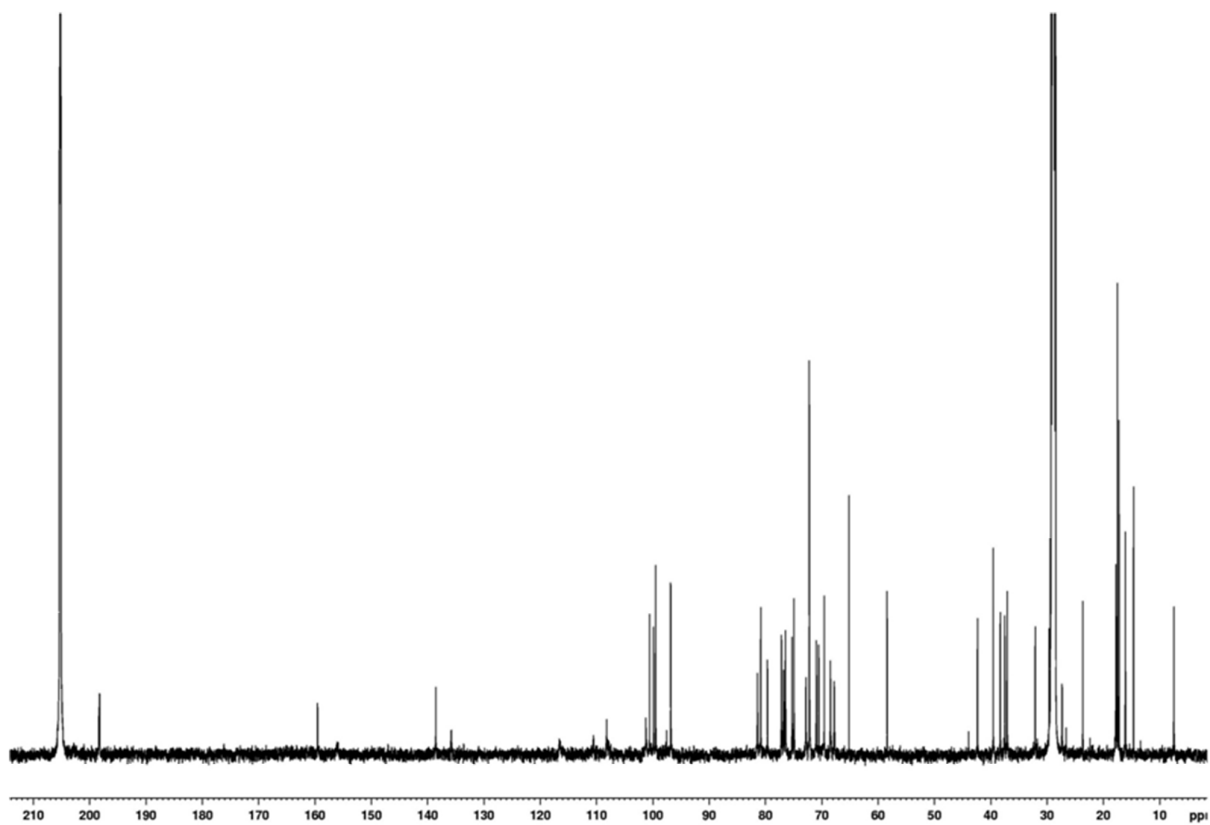

**Figure S25:**  $^{13}\text{C}$ -NMR chart for **11** in acetone- $d_6$  (150 MHz)

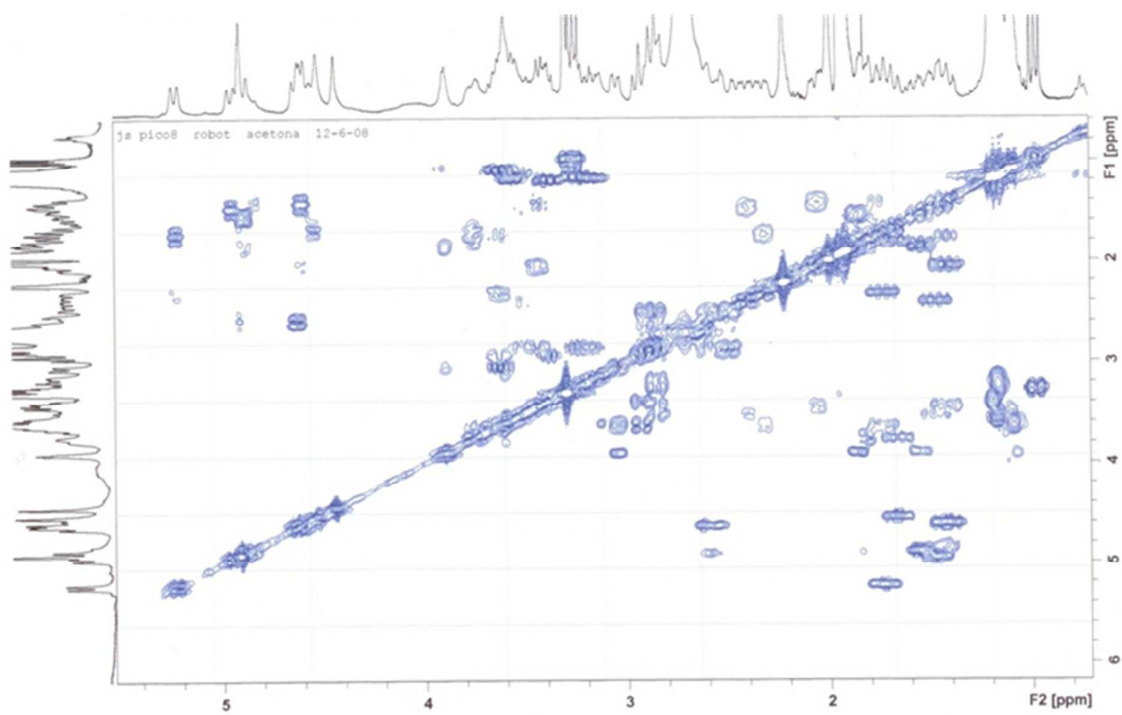

**Figure S26:** COSY chart for **11** in acetone-*d*<sub>6</sub> (256 points for F1 and F2, 48 transients)

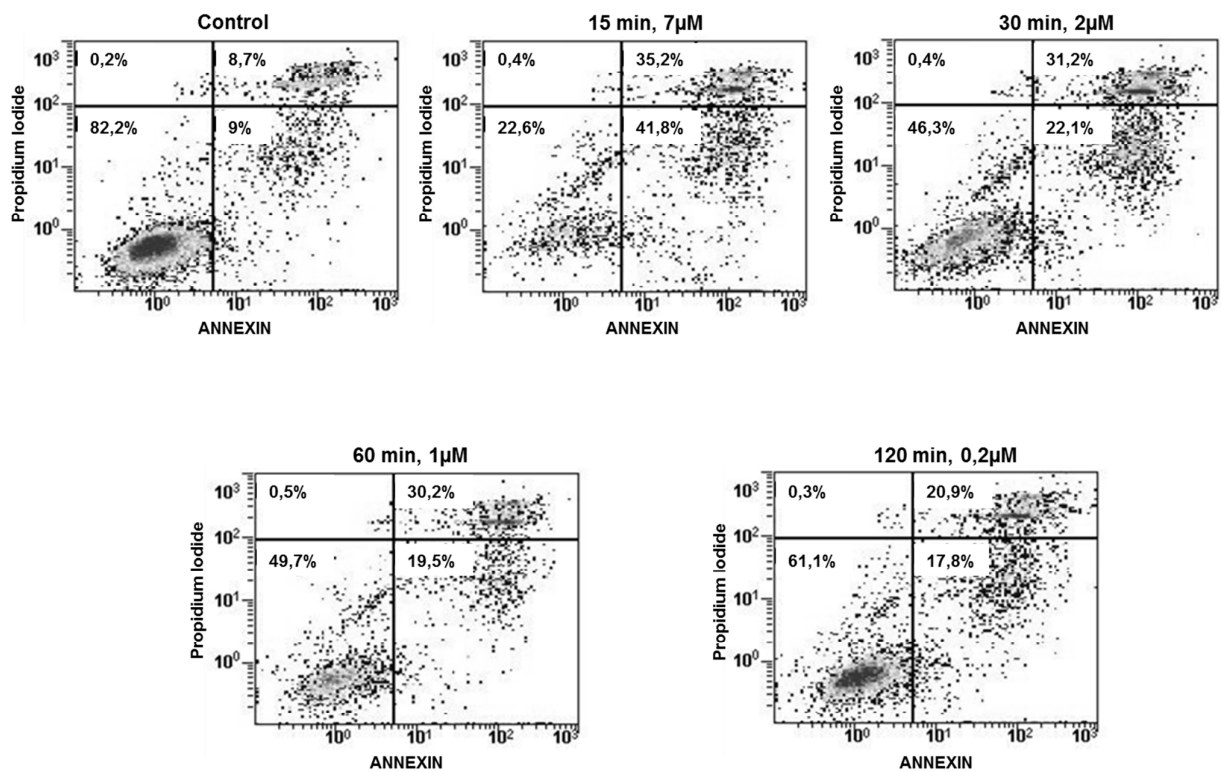

**Figure S27.** Flow cytometry analysis of Colo205 cells exposed to compound **9** at concentration and time indicated and stained with Annexin-V-fluorescein and Propidium iodide after 48h.



**Abbreviations used:**

**cox2**, cyclooxygenase-2

**ESFTs**, Ewing sarcoma family of tumors

**EWS-FLI1**, Ewing sarcoma breakpoint region 1 and Friend leukemia virus integration 1

**GI<sub>50</sub>**, 50% growth inhibition

**IP**, intraperitoneal

**IV**, intravenous

**MDR-1**, multidrug resistant gene 1

**NDP**, nucleoside diphosphate

**NF- $\kappa$ B**, nuclear factor kappa-light-chain-enhancer of activated B cells

**p21<sup>cip1</sup>/waf1**, cyclin-dependent kinase inhibitor 1

**p53**, protein 53

**q2dx10**, a single dose every 2 days times 10

**q3dx10**, a single dose every three days times 10

**R5-A**, modified R5 medium

**siRNA**, small interfering RNA

**Sp1**, Specificity Protein 1

**STAT3**, Signal Transducer and Activator of Transcription 3

**TF**, Transcription Factor

**TGF- $\beta$** , transforming growth factor-beta
